# Supplementary material for: Laying the foundations for an integrated weather pattern and power outage forecasting system in the United Kingdom
Source: Research Square preprint supplement (doi:10.21203/rs.3.rs-3179174/v1), 2023-08-14
Supplement: Supplementary file 1 [file 56a802227bdb0d5af61c2406.pdf]

## 612 Appendix A. Supplementary information

### 613 Appendix A.1. Weather pattern characteristics

614 Table A.2 summarizes the distinctive characteristics of each of the 30 Met  
615 Office weather patterns used throughout this article, including anomalies in  
616 wind speed, snowfall, and temperature for each observed season.

### 617 Appendix A.2. Breakdown of weather-induced power system failures from 618 2010 to 2019 in the UK by season

619 Figs. A.5–A.8 provide a breakdown of weather-induced power system fail-  
620 ures per season ( $\bar{F}_s$  values listed in Table 1).  $F_{xws}$  values are shown as a  
621 function of the direct failure cause  $x$  and daily weather pattern  $w$  when they  
622 occurred.

### 623 Appendix A.3. Long-term probability of occurrence of a weather pattern 624 given the weather pattern in the previous day in spring, sum- 625 mer, and fall

626 Analogously to Fig. 1, Figs. A.9–A.11 show the probability of occurrence  
627 of next-day weather patterns in spring, summer, and fall based on [26].

### 628 Appendix A.4. Supplementary discussion on the frequency of weather-induced 629 power system failures by weather pattern and season in spring, 630 summer, and fall

#### 631 Appendix A.4.1. Great Britain

632 This section provides supplementary information to Section 2.2.1, by in-  
633 vestigating the top three causes of power system failures in spring, summer,  
634 and fall. Trends in power outages caused by lightning strikes, wind and gale,  
635 and solar heat are investigated in summer, whereas trends in power outages  
636 caused by wind and gale, lightning strikes, and snow and ice are investigated  
637 in spring and fall. The 2-dimensional histograms in Figs. A.12–A.14 (charts  
638 on the left) show the frequency of occurrence of a given weather pattern up  
639 to 2 weeks ahead of the occurrence of a weather-induced power outage.

640 In Fig. A.12(a), the main trends in power outages induced by wind and  
641 gale relate to weather patterns 4, 8, 23 and 30 (all westerly types), as nearly a  
642 third of outages occurred during these weather patterns. In turn, Fig. A.12(b)  
643 shows that nearly a quarter of power outages induced by lightning strikes  
644 occurred during or the day after weather pattern numbers 6 (high pressure  
645 extension over the UK) and 7 (cyclonic south-westerly). In Fig. A.12(c),

Table A.2: Distinctive UK characteristics for the set of 30 Met Office weather patterns based on ERA5 (1981 - 2020). In the intensity columns, "low" roughly corresponds to a lower intensity than average under this weather pattern, "moderate" roughly corresponds to a slightly higher intensity than average under this weather pattern and "high" roughly corresponds to a significantly higher intensity than average under this weather pattern. In the season columns, 1 stands for winter, 2 for spring, 3 for summer, and 4 for fall.

| #  | Wind speed |        | Rainfall  |         | Snowfall  |         | Temperature |         |
|----|------------|--------|-----------|---------|-----------|---------|-------------|---------|
|    | Intensity  | Season | Intensity | Season  | Intensity | Season  | Intensity   | Season  |
| 1  | Low        | all    | Moderate  | all     | Moderate  | 1       | Mild        | all     |
| 2  | Low        | all    | Moderate  | 1       | Low       | all     | Warm        | 2, 4    |
| 3  | Low        | all    | Low       | all     | Low       | all     | Warm        | 1, 2, 4 |
| 4  | Moderate   | all    | Low       | all     | Low       | all     | Warm        | 1       |
| 5  | Low        | all    | Moderate  | 2–4     | Low       | all     | Cold        | 1       |
| 6  | Low        | all    | Low       | all     | Low       | all     | Cold        | 1       |
| 7  | Low        | all    | High      | all     | Low       | all     | Warm        | 2       |
| 8  | Moderate   | 2–4    | High      | all     | Moderate  | 1       | Cold        | 3       |
| 9  | Low        | all    | Low       | all     | Moderate  | 1, 4    | Warm        | 2       |
| 10 | Low        | all    | Low       | all     | Low       | all     | Mild        | all     |
| 11 | Low        | all    | High      | all     | High      | 1       | Cold        | 1, 3    |
| 12 | Low        | all    | Low       | all     | Low       | all     | Warm        | 3       |
| 13 | Moderate   | all    | Low       | all     | Low       | all     | Cold        | 3       |
| 14 | Moderate   | all    | High      | 3       | Moderate  | 2       | Cold        | 2, 3    |
| 15 | Moderate   | all    | Low       | all     | Moderate  | 4       | Warm        | 3       |
| 16 | Low        | all    | Low       | all     | Moderate  | 4       | Cold/Warm   | 1/3     |
| 17 | Low        | all    | Low       | all     | Low       | all     | Cold/Warm   | 1, 4/3  |
| 18 | Low        | all    | Low       | all     | Moderate  | 2       | Mild        | all     |
| 19 | Moderate   | 2–4    | High      | 2, 3    | High      | 1, 2, 4 | Cold        | all     |
| 20 | High       | all    | High      | 1, 2, 4 | Low       | all     | Warm/Cold   | 1/2–4   |
| 21 | Moderate   | all    | High      | all     | Low       | all     | Warm/Cold   | 1/3     |
| 22 | Low        | all    | High      | all     | Low       | all     | Cold/Warm   | 1/3     |
| 23 | High       | all    | Low       | all     | Low       | all     | Warm/Cold   | 1/2, 4  |
| 24 | Low        | all    | High      | all     | Moderate  | 1, 2    | Cold        | all     |
| 25 | Low        | all    | Low       | all     | Low       | all     | Cold        | all     |
| 26 | High       | all    | High      | 1, 2, 4 | Moderate  | 1, 2, 4 | Cold        | 2–4     |
| 27 | Moderate   | 2      | Low       | all     | High      | 1, 2, 4 | Cold        | all     |
| 28 | Moderate   | 2      | High      | 1, 3, 4 | High      | 1, 2, 4 | Cold        | all     |
| 29 | Moderate   | 2–4    | High      | all     | Moderate  | 1, 2, 4 | Cold        | 2, 4    |
| 30 | High       | all    | High      | 1, 2, 4 | Moderate  | 2, 4    | Warm/Cold   | 1/2–4   |

646 the main trends in power outages induced by snow and ice relate to weather  
647 patterns 14, 19 and 24 (all northerly types) and 28 (southerly tracking low  
648 undercutting a cold pool over the UK), as almost all outages during or a few  
649 days after these weather patterns in spring.

650 In Fig. A.13(a), the main trends in power outages caused by lightning  
651 strikes relate to weather patterns 5 and 16 (both with a southerly flow over  
652 the UK), as nearly a third of outages occurred during or the day after these  
653 weather patterns. In Fig. A.13(b), the main trends in power outages induced  
654 by wind and gale relate to weather patterns 20 and 21 (both cyclonic westerly  
655 or south-westerly types), as nearly a third of outages occurred during weather  
656 pattern 20 and a few days after weather pattern 21. In turn, Fig. A.13(c)  
657 shows that over 50% of power outages induced by solar heat occurred during  
658 or a few days after weather pattern numbers 3 (anticyclonic south-westerly),  
659 5 (unbiased southerly), 6 (high pressure extension over the UK), 7 (cyclonic  
660 south-westerly) and 22 (very cyclonic southerly) in summer.

661 In Fig. A.14(a), the main trends in power outages induced by wind and  
662 gale relate to weather patterns 14 (cyclonic northerly), 20 (cyclonic westerly),  
663 21 (cyclonic south-westerly), 26 (very cyclonic north-westerly) and 30 (very  
664 cyclonic westerly), as over 50% of outages occurred during these weather  
665 patterns. Likewise, Fig. A.14(b) shows that over 50% of outages caused by  
666 lightning strikes occurred during or the day after weather pattern numbers 23  
667 (unbiased westerly) and 26 (very cyclonic north-westerly). In Fig. A.14(c),  
668 the main trend in power outages induced by snow and ice relates to weather  
669 pattern 14 (cyclonic northerly), as over a third of occurrences were a few  
670 days after this weather pattern in fall.

#### 671 *Appendix A.4.2. Northeast of England*

672 In this section, the top three causes of power system failures investi-  
673 gated in Section Appendix A.4.1 for each season are further analyzed in the  
674 Northeast of England with fault data collected between 2004 and 2021. The  
675 2-dimensional histograms in Figs. A.15–A.17 (charts on the left) show the  
676 corresponding frequency of occurrence of a given weather pattern up to 2  
677 weeks ahead of the occurrence of a weather-induced power outage.

678 In Fig. A.15(a), the main trends in power outages induced by wind and  
679 gale relate to weather patterns 13 (anticyclonic north-westerly), 20 (cyclonic  
680 westerly), 21 (cyclonic south-westerly), 23 (unbiased westerly), 24 (cyclonic  
681 northerly) and 30 (very cyclonic westerly), as over 50% of outages occurred  
682 during these weather patterns. These trends partly match those shown in

Fig. A.12(a), as weather patterns 23 and 30 are also among the most significant ones. In turn, Fig. A.15(b) shows that nearly a quarter of power outages induced by lightning strikes occurred during or the day after weather pattern numbers 7 (cyclonic south-westerly) and 9 (weak high pressure centred over the UK). Again, these trends partly match those shown in Fig. A.12(b), as weather pattern 7 represents the main contribution in both cases. In Fig. A.15(c), the main trends in power outages induced by snow and ice relate to weather patterns 14 (cyclonic northerly), 19 (unbiased northerly), 27 (anticyclonic easterly) and 28 (southerly tracking low undercutting a cold pool over the UK), as over 50% of outages occurred during or a few days after these weather patterns in spring. Again, these results partly match those shown in Fig. A.12(c), as weather patterns 14, 19 and 28 are also among the most significant ones.

In Fig. A.16(a), the main trends in power outages caused by lightning strikes relate to weather patterns 1 (unbiased north-westerly), 5 (unbiased southerly), 7 (cyclonic south-westerly), 8 (cyclonic westerly) and 11 (low centred over the UK), as almost 50% of outages occurred during or the day after these weather patterns. These results partly agree with those shown in Fig. A.13(a), as weather pattern 5 is among the main contributions and weather patterns 1, 7, 8 and 11 are also related to a significant number of outages. In Fig. A.16(b), the main trends in power outages induced by wind and gale are not as strong as in Fig. A.13(b), but weather pattern 20 (cyclonic westerly) is among the main contributors. Notably, roughly the same number of outages shown in Fig. A.16(b) (over 50% of total) occurred during weather patterns 1 (unbiased north-westerly), 2 (cyclonic south-westerly), 5 (unbiased southerly), 7 (cyclonic south-westerly), 8 (cyclonic westerly), 20 (cyclonic westerly) and 26 (very cyclonic south-westerly). In turn, Fig. A.16(c) shows that almost all outages induced by solar heat occurred during or a few days after weather pattern numbers 3 (anticyclonic south-westerly), 5 (unbiased southerly), 6 (high-pressure extension towards the UK) and 17 (anticyclonic southerly or south-easterly) in summer. These results partly agree with those shown in Fig. A.13(c), as weather pattern numbers 3, 5, and 6 are also among the main trends a few days before outages induced by solar heat in summer.

In Fig. A.17(a), the main trends in power outages induced by wind and gale relate to weather patterns 13 (anticyclonic north-westerly), 15 (unbiased south-westerly), 20 (cyclonic westerly), 23 (unbiased westerly), 26 (very cyclonic north-westerly) and 30 (very cyclonic westerly), as over 50% of outages occurred during these weather patterns. These results mostly agree



721 with those shown in Fig. A.14(a), as some the main trends relate to weather  
 722 patterns 20, 26 and 30 and some of the secondary trends relate to weather  
 723 patterns 13 and 15. In turn, Fig. A.17(b) shows that nearly a quarter of  
 724 outages caused by lightning strikes occurred during or the day after weather  
 725 pattern numbers 19 (unbiased northerly) and 29 (very cyclonic south or  
 726 south-westerly). These trends differ from those shown in Fig. A.14(b), which  
 727 relate weather pattern numbers 23 (unbiased westerly) and 26 (very cyclonic  
 728 south-westerly) to the majority of outages caused by lightning strikes. In  
 729 Fig. A.17(c), the main trends in power outages induced by snow and ice  
 730 relate to weather patterns 19 (unbiased northerly) and 27 (anticyclonic east-  
 731 erly), as nearly 50% of occurrences happened during or a few days after them  
 732 in fall. It is noteworthy that these trends correspond to secondary trends in  
 733 Fig. A.14(c). Likewise, the main trend relating power outages induced by  
 734 snow and ice in fall to weather pattern 14 (cyclonic northerly) in Fig. A.14(c)  
 735 corresponds to a secondary trend in Fig. A.17(c).

#### 736 *Appendix A.4.3. Southern Scotland*

737 In this section, the top three causes of power system failures investigated  
 738 in Section Appendix A.4.1 for each season are further analyzed in Southern  
 739 Scotland with fault data collected between 2017 and 2022. The 2-dimensional  
 740 histograms in Figs. A.18–A.20 (charts on the left) show the corresponding  
 741 frequency of occurrence of a given weather pattern up to 2 weeks ahead of  
 742 the occurrence of a weather-induced power outage.

743 In Fig. A.18(a), the main trends in power outages induced by wind  
 744 and gale relate to weather patterns 1 (unbiased north-westerly), 2 (cyclonic  
 745 south-westerly), 8 (cyclonic westerly) and 13 (anticyclonic north-westerly), as  
 746 roughly a quarter of outages occurred during these weather patterns. These  
 747 trends partly match those shown in Fig. A.12(a), as weather pattern 8 is also  
 748 among the strongest contributions. In turn, Fig. A.18(b) shows that nearly a  
 749 quarter of power outages induced by lightning strikes occurred during or the  
 750 day after weather pattern numbers 2 (cyclonic south-westerly) and 6 (high  
 751 pressure extension towards the UK). These results partly agree with those  
 752 shown in Fig. A.12(b), as weather pattern 6 is among the strongest contribu-  
 753 tions in both cases. In Fig. A.18(c), all the 4 outages caused by snow and ice  
 754 in spring relate to weather patterns 28 (southerly tracking low undercutting  
 755 a cold pool over the UK) and 29 (very cyclonic south or south-westerly),  
 756 as they occurred during or a few days after these weather patterns. Again,  
 757 these results partly match those shown in Fig. A.12(c), as weather pattern

number 28 is among the most significant ones.

In Fig. A.19(a), the main trends in power outages caused by lightning strikes relate to weather patterns 1 (unbiased north-westerly) and 5 (unbiased southerly), 7 (cyclonic south-westerly), 8 (cyclonic westerly) and 11 (low centred over the UK), as roughly a quarter of outages occurred during these weather patterns. These results partly agree with those shown in Fig. A.13(a), as weather pattern 5 is among the main contributions and weather pattern 1 is related to a significant number of outages. In Fig. A.19(b), the main trends in power outages induced by wind and gale are related to weather patterns 1 (unbiased north-westerly), 2 (cyclonic south-westerly), 3 (anticyclonic westerly), 8 (cyclonic westerly) and 13 (anticyclonic north-westerly), as roughly 50% of outages occurred during these weather patterns. These weather patterns represent slightly less than a fifth of occurrences in Fig. A.13(b) and are not among the main trends in Great Britain. In turn, Fig. A.19(c) shows that over a third of outages induced by solar heat occurred during or a few days after weather pattern numbers 3 (anticyclonic westerly), 6 (high pressure extension towards the UK) and 12 (unbiased south-westerly) in summer. These results partly agree with those shown in Fig. A.13(c), as weather pattern numbers 3 and 6 are also among the main trends a few days ahead of an outage induced by solar heat in summer.

In Fig. A.20(a), the main trends in power outages induced by wind and gale relate to weather patterns 13 (anticyclonic north-westerly), 14 (cyclonic northerly), 15 (unbiased south-westerly), 21 (cyclonic south-westerly) and 22 (cyclonic southerly), as over a third of outages occurred during these weather patterns. These results partly agree with those shown in Fig. A.14(a), as weather patterns 14 and 21 are among the main trends in Great Britain. In turn, Fig. A.20(b) shows that half the outages caused by lightning strikes occurred during weather pattern numbers 7 (cyclonic south-westerly), 8 (cyclonic westerly), 13 (anticyclonic north-westerly), 14 (cyclonic northerly) and 26 (very cyclonic north-westerly). These trends partly agree with those shown in Fig. A.14(b), as weather pattern number 26 is also related to a significant number of outages caused by lightning strikes. In Fig. A.20(c), 3 out of 7 power outages induced by snow and ice occurred a few days after weather pattern 26 in fall. This results is clearly different from those shown in Fig. A.14(c), but similar to the results obtained for power outages induced by snow and ice in Southern Scotland in winter, as shown in Fig. 4(c).

794 *Appendix A.5. Supplementary discussion on the analysis of trends in power*  
795 *outages and weather pattern transitions in spring, summer,*  
796 *and fall*

797 In this section, the main trends associated with the weather-induced  
798 power outages described in Section Appendix A.4 are further evaluated  
799 in relation to the most likely proceeding weather pattern transitions. The  
800 Sankey diagrams in Figs. A.12–A.20 (charts on the right) show the break-  
801 down of weather pattern transitions associated with the most common causes  
802 of weather-induced power outages. Analogously to Section 2.3, only the over-  
803 all trends associated with weather-induced power outages in Great Britain  
804 are further investigated in this section, given the similarities between the  
805 results shown in Sections Appendix A.4.1–Appendix A.4.3 and the larger  
806 sample size of fault incidents available from Section Appendix A.4.1.

807 In spring, the main trends in power outages induced by wind and gale  
808 (Fig. A.12(a)) are represented by the next-day weather transitions 8→8 (a  
809 persisting cyclonic westerly type), 4→23 (a transition between two unbi-  
810 ased westerly types over the UK, whereby the transitioned type has stronger  
811 winds), and 30→30 (a persisting very cyclonic westerly type). As in win-  
812 ter, there is a focus on cyclonic westerly types, but these tend to have  
813 weaker areas of low pressure driving them. In turn, the main trends in  
814 power outages induced by lightning strikes (Fig. A.12(b)) are represented by  
815 the next-day weather transitions 6→6 (a persisting high pressure extension  
816 over the UK) and 7→7 (a persisting cyclonic south-westerly type). This  
817 represents a contrast in types, with weather pattern 6 likely representing  
818 lighting associated with convective outbreaks and meso-scale features, and  
819 weather pattern 7 likely reflecting lightning associated with larger-scale sys-  
820 tems). For power outages induced by snow and ice (Fig. A.12(c)), the main  
821 trends are represented by the next-day weather transitions 19→19 (persisting  
822 unbiased northerly type), 28→16 (representing a Scandinavian high pressure  
823 system establishing its influence over the UK), 24→14 (representing transi-  
824 tions between two cyclonic northerly types), and 24→24 (a persisting cyclonic  
825 northerly type) a few days ahead of an outage.

826 In summer, the main trends in power outages induced by lightning strikes  
827 (Fig. A.13(a)) are represented by the next-day weather transitions 5→5 (a  
828 persisting unbiased southerly flow over the UK) and 16→16 (another per-  
829 sisting southerly flow over the UK, but with more of a high-pressure influ-  
830 ence). In turn, the main trend in power outages induced by wind and gale  
831 (Fig. A.13(b)) is represented by the next-day weather transition 21→20 (a

832 transitioning cyclonic south-westerly to westerly type). For power outages  
833 induced by solar heat (Fig. A.13(c)), the main trends are represented by the  
834 next-day weather transitions 3→3 (a persisting settled westerly or south-  
835 westerly type), 3→5 (a transition between a settled westerly or south-westerly  
836 type and a high-pressure dominating southerly type), 5→5 (a persistence  
837 of the high-pressure dominating southerly type), 6→6 (a persistence of high  
838 pressure extending over the UK), 7→7 (a persisting cyclonic south-westerly  
839 type), and 22→22 (another persisting cyclonic south-westerly type) a few  
840 days ahead of an outage.

841 In fall, the main trends in power outages induced by wind and gale  
842 (Fig. A.14(a)) are represented by the next-day weather transitions 13→14 (a  
843 transitioning anticyclonic to cyclonic north-westerly), 20→20 (a persisting  
844 cyclonic westerly), 21→21 (a persisting cyclonic south-westerly), 22→21 (a  
845 transition between a cyclonic southerly and south-westerly), 20→26 (a tran-  
846 sition between a cyclonic westerly and north-westerly), 26→26 (a persistence  
847 of a cyclonic north-westerly), 30→26 (a transition between a very cyclonic  
848 westerly and north-westerly), and 30→30 (a persisting very cyclonic westerly  
849 type). In turn, the main trends in power outages induced by lightning strikes  
850 (Fig. A.14(b)) are represented by the next-day weather transitions 23→26  
851 (a transition between a windy unbiased westerly type and a windy, very  
852 cyclonic westerly type) and 15→23 (a transition between a windy unbiased  
853 south-westerly type and a windy, unbiased westerly type). For power out-  
854 ages induced by snow and ice (Fig. A.14(c)), the main trends are represented  
855 by the next-day weather transitions 14→14 (a persisting cyclonic northerly  
856 type), 14→30 (a transitioning cyclonic northerly to very cyclonic westerly  
857 type), 19→19 (a persisting unbiased northerly type), 19→27 (a transitioning  
858 northerly to easterly type), 27→27 (a persisting easterly type), and 30→24  
859 (a transitioning very cyclonic westerly to cyclonic northerly type) a few days  
860 ahead of an outage.

861 By comparing these main trends associated with weather-induced power  
862 outages with the weather pattern transition matrices shown in Section 2.1  
863 (Fig. 1) and Section Appendix A.3 (Figs. A.9–A.11), it can be noticed that  
864 they are mostly representative in a long-term horizon. Notably, all the main  
865 trends in weather-induced power outages in winter and summer also represent  
866 main transitions (dark blue background and red text) or secondary trends  
867 (dark blue background and white text) in the long-term weather pattern tran-  
868 sition matrices. Although this is mostly true for trends in weather-induced  
869 power outages in spring and fall, there are few exceptions which represent mi-

nor trends (light blue background plus white or black text) in the long-term weather pattern transition matrices:  $28 \rightarrow 16$ ,  $24 \rightarrow 14$ , and  $4 \rightarrow 23$  in spring plus  $14 \rightarrow 30$  and  $19 \rightarrow 27$  in fall. Note that these less likely weather pattern transitions are mostly related to power outages caused by snow and ice in these seasons, which suggests that the sample size of those fault incidents might be inadequate (i.e., too small).

*Appendix A.6. Supplementary discussion on the expected effects of weather pattern transitions on weather-induced power system failures in spring, summer, and fall*

This section provides a discussion on the expected effects of weather pattern transitions on weather-induced power system failures described in Section Appendix A.4. In the next paragraphs, the main trends in weather-induced power outages and weather pattern transitions identified in Section Appendix A.5 are compared against the distinctive characteristics listed in Table A.2 for each representative weather pattern and weather phenomenon in spring, summer, and fall.

In spring, weather patterns 4, 8, 23, and 30 are characterized by moderate to high wind speeds, whereas weather patterns 8 and 30 present high precipitation volumes and weather patterns 23 and 30 are colder than average. Therefore, it is expected that they are among the main trends in power outages caused by wind and gale in spring. In the trends associated with outages induced by lightning strikes, it can be noticed that weather pattern 7 is wetter and warmer than average in spring, whereas weather pattern 6 is relatively mild. In turn, weather patterns 14, 19, 24, and 28 are characterized by moderate to high snowfall and are colder than average, whereas weather patterns 14, 19, and 28 are also characterized by moderate to high wind speeds and weather patterns 19 and 24 also present high precipitation volumes in spring. Therefore, these weather patterns are expected to be among the main trends in power outages caused by snow and ice in spring.

In the trends associated with outages induced by lightning strikes in summer, note that weather pattern 5 is wetter than average, whereas weather pattern 16 warmer than average. In turn, weather patterns 20 and 21 associated with power outages caused by wind and gale present moderate to high wind speeds and are colder than average in summer. In the trends associated with outages induced by solar heat, it can be noticed that weather patterns 3, 5, 6 and 7 are relatively mild in terms of average temperatures in summer, whereas weather pattern 22 is warmer than average. Thereby, the

907 trends obtained for power outages induced by distinct weather phenomena  
908 in summer fairly meet the expected effects.

909 In fall, weather patterns 13, 14, 20, 21, 26, and 30 are characterized by  
910 moderate to high wind speeds, whereas weather patterns 20, 21, 26, and  
911 30 are wetter than average and weather patterns 20, 26, and 30 are colder  
912 than average. Therefore, these weather patterns are expected to represent  
913 the main trends in power outages caused by wind and gale in fall. In turn,  
914 weather pattern 26 presents high precipitation volumes, unlike weather pat-  
915 terns 15 and 23 present associated with outages induced by lightning strikes.  
916 In the trends associated with outages induced by snow and ice in fall, it can  
917 be noticed that weather patterns 19, 27 and 30 are characterized by moder-  
918 ate to high snowfall, whereas weather patterns 19, 24, 27, and 30 are colder  
919 than average. Unsurprisingly, these weather patterns are among the main  
920 trends in power outages caused by snow and ice in fall.

921 The fact that some relatively mild weather patterns are among the main  
922 trends in power outages caused by snow and ice in spring and fall (e.g. 4  
923 and 16 in spring, 14 in fall) suggests that impacts occurred during extreme  
924 versions of those weather patterns (i.e., associated with colder than aver-  
925 age temperatures, heavier than average snowfalls and/or wet snow events).  
926 Therefore, effects of weather pattern transitions on weather-induced power  
927 system failures are better explained when the main trends in weather-induced  
928 power outages also represent main trends in the long-term weather pattern  
929 transition matrices.

930 Of particular note is that in Table 1, lightning strikes are in the top three  
931 causes of power outages in all seasons. This is despite the fact that using  
932 lightning observations over Europe, [37] show that the lightning flash density  
933 for the UK is significantly lower than over much of continental Europe. In  
934 Scotland especially, lightning flash densities are lower than  $0.1 \text{ flashes km}^{-2}$   
935  $\text{year}^{-1}$  yet our results in Fig. 4 and Figs. A.18–A.20 show that lightning  
936 strikes cause a significant number of outages in Southern Scotland, especially  
937 associated with weather pattern 26 in winter. Similarly, a combined dataset  
938 of thunder days by [38] show that most parts of the UK have less than 15  
939 days of thunderstorms per year, yet our analysis in Table 1 shows that it is  
940 a significant cause of network faults. This would suggest that multiple faults  
941 due to lightning occur on the network on the same day.

942 *Appendix A.7. Validation against past power outages induced by extreme*  
943 *weather events*

944 In this section, the methodology is validated against past power outages  
945 caused by extreme weather events, considering the occurrences described in  
946 [39] from 2000 to 2022. Relevant occurrences with impacts on power grids  
947 are listed in Table A.3, where columns indicate: the start date of an extreme  
948 weather event, attributed causes of power outages, weather pattern number  
949 sequence up to 2 weeks ahead of the start date, and whether the weather  
950 pattern trends are consistent with those obtained for the corresponding sea-  
951 son and weather phenomena in Section 2.3. Consistency between weather  
952 pattern trends is derived based on the occurrence of at least one expected  
953 transition within the observed types a few days ahead of an outage. For  
954 power outages induced by lightning strikes or wind and gale, consistency  
955 is verified in the previous day; for power outages induced by solar heat or  
956 snow and ice, consistency is verified up to 5 days ahead of an outage to ac-  
957 count for accumulated effects. In the fourth column, Y and N stand for yes  
958 and no, whereas the letters in parenthesis correspond to the region in which  
959 trends were evaluated: GB (overall), Northeast of England and/or Southern  
960 Scotland (if appropriate).

Table A.3: Past power outages induced by extreme weather events in the UK from 2000 to 2022.

| Start date  | Causes                              | Sequence of weather pat-<br>terns day 0 $\rightarrow$ day 14 | Consistent<br>trends(Y/N)? |
|-------------|-------------------------------------|--------------------------------------------------------------|----------------------------|
| 30-Oct-2000 | wind and gale                       | 30-30-21-21-8-26-4-<br>10-12-12-5-15-15-15                   | Y(GB)                      |
| 07-Jul-2004 | wind and gale,<br>lightning strikes | 6-6-13-4-4-8-8-2-12-<br>3-2-22-7-8                           | N(GB)                      |
| 07-Jan-2005 | wind and gale                       | 20-20-23-23-23-23-23-<br>23-23-15-26-20-10-20                | Y(GB),<br>Y(NE)            |
| 11-Jan-2005 | wind and gale                       | 20-20-20-20-20-20-23-<br>23-23-23-23-23-23-15                | Y(GB),<br>Y(SS)            |
| 10-Mar-2008 | wind and gale                       | 30-30-30-20-23-13-13-<br>14-26-26-20-23-26-26                | Y(GB),<br>Y(SS), Y(NE)     |
| 07-Jan-2010 | snow and ice                        | 19-19-19-27-27-27-19-<br>19-28-28-28-28-28-28                | Y(GB),<br>Y(SS), Y(NE)     |

Continued on next page

Table A.3 – continued from previous page

| Start date  | Causes                         | Sequence of weather patterns day 0→day 14     | Consistent trends(Y/N)? |
|-------------|--------------------------------|-----------------------------------------------|-------------------------|
| 21-Dec-2010 | snow and ice                   | 28–28–28–28–19–19–25–<br>25–27–27–9–25–25–19  | Y(GB),<br>Y(SS), Y(NE)  |
| 26-Nov-2011 | wind and gale                  | 23–23–15–15–15–10–12–<br>5–22–22–16–16–16–16  | Y(GB),<br>N(SS), Y(NE)  |
| 08-Dec-2011 | wind and gale                  | 4–26–26–26–26–26–20–<br>20–20–20–15–23–23–23  | Y(GB),<br>N(SS), N(NE)  |
| 13-Jan-2012 | wind and gale                  | 25–13–18–18–18–10–13–<br>13–26–26–26–20–20–20 | N(GB),<br>N(SS)         |
| 28-Oct-2013 | wind and gale                  | 26–30–30–7–7–30–29–<br>22–22–22–28–7–7–7      | Y(GB)                   |
| 05-Dec-2013 | wind and gale                  | 14–13–18–18–25–13–13–<br>25–18–18–25–25–25–19 | Y(GB),<br>N(SS), Y(NE)  |
| 18-Dec-2013 | wind and gale                  | 21–15–20–15–15–12–7–<br>12–12–12–15–3–13–14   | N(GB),<br>N(SS), Y(NE)  |
| 23-Dec-2013 | wind and gale                  | 30–20–20–15–20–21–15–<br>20–15–15–12–7–12–12  | Y(GB),<br>Y(SS)         |
| 12-Feb-2014 | wind and gale                  | 30–30–30–30–30–30–30–<br>29–29–21–21–30–21–5  | Y(GB),<br>Y(SS), Y(NE)  |
| 26-Dec-2015 | wind and gale                  | 3–3–20–20–20–20–20–<br>21–21–21–22–16–16–9    | N(GB),<br>N(SS), N(NE)  |
| 20-Nov-2016 | wind and gale                  | 9–6–6–6–19–11–24–30–<br>26–26–20–23–18–18     | N(GB)                   |
| 16-Oct-2017 | wind and gale                  | 3–15–15–15–20–20–21–<br>10–13–13–13–14–23–23  | N(GB)                   |
| 28-Feb-2018 | snow and ice                   | 12–6–15–20–21–21–20–<br>26–20–10–20–10–13–6   | N(GB),<br>N(SS), N(NE)  |
| 14-Jun-2018 | wind and gale                  | 20–2–1–1–1–1–6–6–5–9–<br>9–9–1–6              | N(GB),<br>N(SS), N(NE)  |
| 19-Sep-2018 | wind and gale                  | 21–21–21–2–3–4–10–23–<br>23–15–2–5–5–6        | Y(GB),<br>N(SS), N(NE)  |
| 11-Oct-2018 | wind and gale                  | 22–22–21–20–10–1–13–<br>10–13–13–13–13–23–13  | N(GB)                   |
| 15-Dec-2018 | wind and gale,<br>snow and ice | 22–12–12–22–12–9–14–<br>26–26–2–3–9–24–30     | N(GB),<br>Y(SS), N(NE)  |

Continued on next page



Table A.3 – continued from previous page

| Start date  | Causes                         | Sequence of weather patterns day 0→day 14     | Consistent trends(Y/N)? |
|-------------|--------------------------------|-----------------------------------------------|-------------------------|
| 26-Apr-2019 | wind and gale                  | 2–21–29–29–29–2–18–<br>17–12–16–16–16–16–16   | N(GB)                   |
| 02-Nov-2019 | wind and gale                  | 24–8–16–17–27–27–9–<br>14–7–11–11–3–10–19     | N(GB)                   |
| 09-Dec-2019 | wind and gale                  | 26–26–20–26–20–20–15–<br>18–25–9–9–24–24–29   | Y(GB)                   |
| 08-Feb-2020 | wind and gale                  | 20–15–12–18–13–4–8–<br>30–30–30–30–30–30–21   | N(GB),<br>Y(SS), Y(NE)  |
| 19-Aug-2020 | wind and gale                  | 29–7–7–5–3–10–6–6–5–<br>5–6–6–12–22           | N(GB)                   |
| 02-Oct-2020 | wind and gale                  | 11–11–2–2–10–5–19–14–<br>24–8–8–4–10          | N(GB)                   |
| 25-Jul-2021 | lightning strikes              | 2–2–5–3–3–9–9–6–6–10–<br>10–10–1–1            | Y(GB)                   |
| 26-Nov-2021 | wind and gale,<br>snow and ice | 14–13–25–25–25–25–13–<br>23–23–23–10–18–12–16 | Y(GB),<br>N(SS), Y(NE)  |
| 29-Jan-2022 | wind and gale                  | 13–18–13–18–18–18–18–<br>18–18–25–25–18–18–13 | N(GB),<br>N(SS), N(NE)  |
| 16-Feb-2022 | wind and gale                  | 30–20–26–8–15–18–13–<br>23–23–23–26–23–26–4   | Y(GB),<br>Y(SS), Y(NE)  |
| 18-Feb-2022 | wind and gale                  | 26–26–30–20–26–8–15–<br>18–13–23–23–23–26–23  | Y(GB),<br>Y(SS), Y(NE)  |
| 19-Jul-2022 | solar heat                     | 2–3–12–3–3–13–10–10–<br>12–6–18–18–13–13      | Y(GB),<br>N(NE)         |
| 11-Dec-2022 | snow and ice                   | 19–19–28–28–28–28–27–<br>19–28–27–25–27–27–27 | Y(GB),<br>N(SS), Y(NE)  |

961 It can be noticed in Table A.3 that nearly 50% of the power outages at-  
 962 tributed to exceptional weather conditions occurred in winter, nearly three  
 963 quarters occurred in the second half of the time horizon (i.e., after 2010),  
 964 and over 80% were caused by wind and gale. Thereby, the ability to iden-  
 965 tify relevant trends in weather patterns which can be used to predict power  
 966 outages caused by wind and gale and/or in winter is particularly important  
 967 to improve grid preparedness.

968 The fourth column of Table A.3 shows that the weather pattern transi-  
 969 tions of 20 out of 36 events (55.6%) are consistent with the main trends (Y)  
 970 in Great Britain (GB). It also shows that 10 out of 22 events (45.5%) which  
 971 led to power outages in Southern Scotland (SS) and that 13 out of 21 events  
 972 (61.9%) which led to power outages in Northeast England (NE) are consis-  
 973 tent with the main trends obtained at regional level. These results indicate  
 974 that the relevant weather patterns and trends obtained in Great Britain are  
 975 reliable, but regionally specific information is important for forecasting risks.  
 976 The results also highlight that the observation of high-risk weather patterns  
 977 / pattern transitions does not necessarily mean impacts on the energy net-  
 978 work will be experienced, but instead can be used to flag a higher-risk period  
 979 where mitigating action may be appropriate.

#### 980 *Acknowledgments*

981 This research was supported by the UK EPSRC under the auspices of the  
 982 “Supergen Energy Networks Hub” project, grant number EP/S00078X/2.  
 983 We would like to thank the Energy Networks Association and its member  
 984 organizations for providing their NaFIRS data, Northern Powergrid and Scot-  
 985 tish Power Networks for providing their regional data, and Dr. Sam Harrison  
 986 for the original code to extend the weather pattern record to the present.

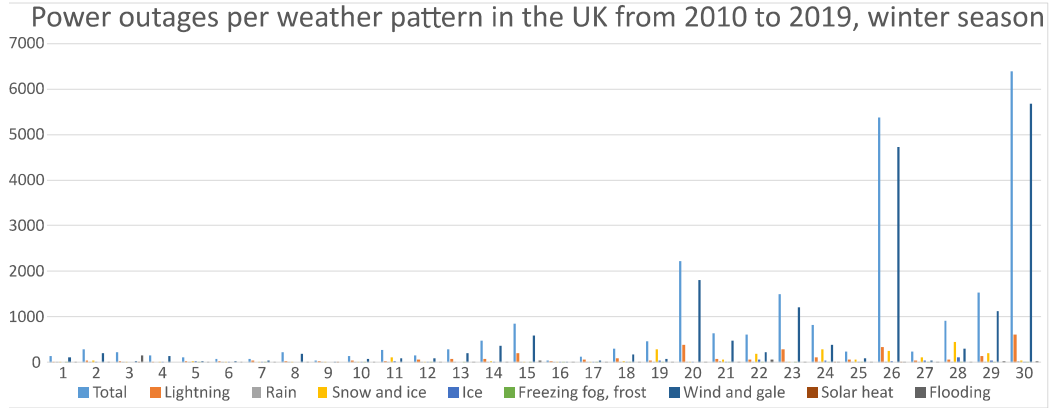

Figure A.5: Breakdown of weather-induced power system failures from 2010 to 2019 in the UK (y-axis) per weather pattern (x-axis) in winter.

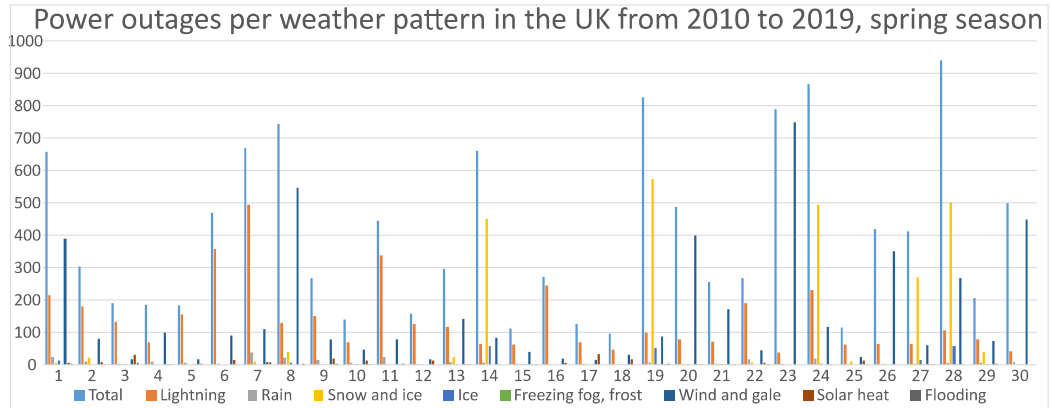

Figure A.6: Breakdown of weather-induced power system failures from 2010 to 2019 in the UK (y-axis) per weather pattern (x-axis) in spring.

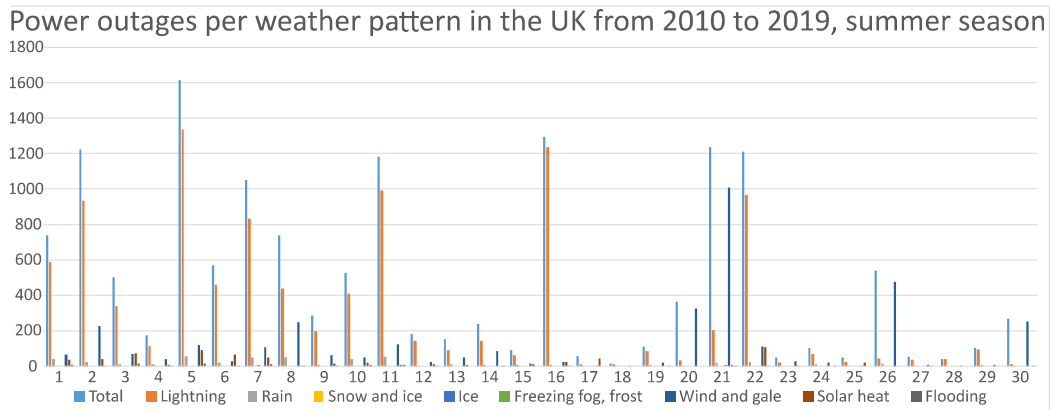

Figure A.7: Breakdown of weather-induced power system failures from 2010 to 2019 in the UK (y-axis) per weather pattern (x-axis) in summer.

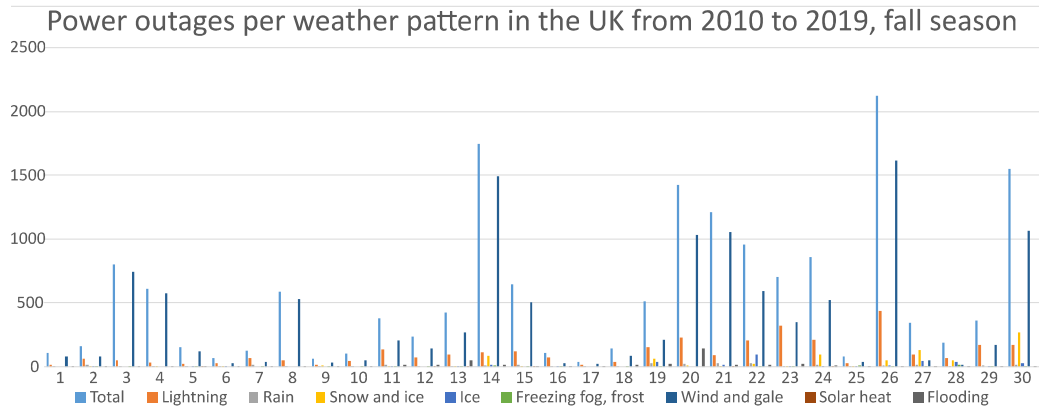

Figure A.8: Breakdown of weather-induced power system failures from 2010 to 2019 in the UK (y-axis) per weather pattern (x-axis) in fall.

|                 |    | Weather Pattern next day |       |       |       |       |       |       |       |       |       |       |       |       |       |       |       |       |       |       |       |       |       |       |       |      |       |       |       |       |       |
|-----------------|----|--------------------------|-------|-------|-------|-------|-------|-------|-------|-------|-------|-------|-------|-------|-------|-------|-------|-------|-------|-------|-------|-------|-------|-------|-------|------|-------|-------|-------|-------|-------|
|                 |    | 1                        | 2     | 3     | 4     | 5     | 6     | 7     | 8     | 9     | 10    | 11    | 12    | 13    | 14    | 15    | 16    | 17    | 18    | 19    | 20    | 21    | 22    | 23    | 24    | 25   | 26    | 27    | 28    | 29    | 30    |
| Weather Pattern | 1  | 10.70                    | 8.63  | 7.84  | 5.10  | 2.35  | 5.49  | 3.53  | 5.49  | 5.10  | 7.06  | 2.75  | 0.39  | 5.88  | 3.53  | 0.39  | 0.39  | 0.00  | 0.39  | 2.35  | 1.18  | 0.00  | 0.00  | 0.00  | 1.18  | 0.00 | 0.00  | 0.00  | 0.78  | 0.00  | 0.00  |
|                 | 2  | 2.35                     | 27.06 | 3.53  | 5.49  | 5.10  | 0.78  | 5.10  | 7.45  | 0.00  | 3.92  | 3.53  | 4.31  | 0.00  | 0.00  | 5.10  | 0.39  | 0.00  | 0.00  | 0.39  | 5.10  | 18.58 | 2.35  | 0.39  | 0.00  | 0.00 | 0.78  | 0.00  | 0.39  | 1.96  | 1.18  |
|                 | 3  | 2.63                     | 6.14  | 28.07 | 3.07  | 2.19  | 4.39  | 6.14  | 1.75  | 7.46  | 0.88  | 0.44  | 18.47 | 0.88  | 0.44  | 1.75  | 4.82  | 3.95  | 3.95  | 1.75  | 0.44  | 0.88  | 2.63  | 0.44  | 0.00  | 0.44 | 0.00  | 0.00  | 0.00  | 0.00  | 0.00  |
|                 | 4  | 7.20                     | 3.79  | 11.36 | 20.17 | 0.00  | 0.38  | 3.79  | 7.20  | 1.52  | 5.30  | 0.00  | 1.52  | 5.30  | 4.17  | 4.55  | 0.00  | 0.00  | 0.00  | 0.00  | 2.65  | 1.89  | 0.00  | 3.03  | 1.14  | 0.00 | 5.30  | 0.00  | 0.00  | 0.00  | 0.76  |
|                 | 5  | 2.09                     | 5.44  | 3.77  | 0.00  | 35.54 | 8.79  | 2.51  | 0.00  | 4.60  | 2.09  | 9.21  | 4.60  | 0.42  | 0.00  | 0.00  | 5.02  | 2.93  | 0.00  | 0.42  | 0.00  | 0.00  | 7.95  | 0.00  | 0.00  | 0.42 | 0.00  | 2.51  | 0.84  | 0.84  | 0.00  |
|                 | 6  | 3.67                     | 1.98  | 2.54  | 0.00  | 7.91  | 42.00 | 0.28  | 0.56  | 5.65  | 7.91  | 0.56  | 3.39  | 4.24  | 0.00  | 0.85  | 0.56  | 5.37  | 3.39  | 1.98  | 0.28  | 0.00  | 0.28  | 0.00  | 0.00  | 5.08 | 0.00  | 1.41  | 0.00  | 0.00  | 0.00  |
|                 | 7  | 1.47                     | 5.87  | 2.64  | 1.47  | 2.05  | 0.00  | 43.11 | 5.57  | 5.57  | 0.00  | 3.52  | 0.88  | 0.29  | 1.17  | 0.88  | 3.23  | 0.00  | 0.29  | 0.00  | 0.29  | 5.87  | 7.33  | 0.00  | 1.47  | 0.29 | 0.59  | 0.00  | 1.47  | 4.40  | 0.29  |
|                 | 8  | 6.50                     | 6.14  | 0.72  | 10.11 | 0.00  | 0.00  | 8.66  | 35.10 | 0.36  | 0.72  | 3.97  | 0.00  | 0.36  | 3.25  | 0.36  | 0.36  | 0.36  | 0.00  | 0.00  | 1.08  | 5.42  | 0.36  | 0.72  | 5.42  | 0.72 | 4.33  | 0.00  | 0.00  | 1.81  | 2.89  |
|                 | 9  | 2.56                     | 0.32  | 4.17  | 0.64  | 3.21  | 6.09  | 7.37  | 0.00  | 43.91 | 0.00  | 2.88  | 0.64  | 2.88  | 1.28  | 0.00  | 7.05  | 1.60  | 0.64  | 5.13  | 0.00  | 0.00  | 0.32  | 0.00  | 0.32  | 3.53 | 0.32  | 2.56  | 2.56  | 0.00  | 0.00  |
|                 | 10 | 5.99                     | 4.87  | 3.37  | 4.49  | 1.12  | 5.62  | 0.00  | 0.37  | 0.75  | 30.71 | 0.75  | 3.00  | 6.74  | 1.87  | 8.24  | 0.00  | 0.00  | 6.74  | 0.37  | 4.49  | 0.00  | 0.37  | 8.99  | 0.00  | 0.00 | 0.37  | 0.00  | 0.00  | 0.37  | 0.37  |
|                 | 11 | 7.60                     | 2.80  | 0.00  | 0.40  | 4.80  | 2.40  | 7.20  | 5.60  | 3.20  | 0.00  | 40.40 | 0.00  | 0.00  | 2.80  | 0.00  | 1.60  | 0.00  | 0.00  | 5.20  | 0.00  | 0.40  | 2.00  | 0.00  | 4.40  | 0.00 | 0.00  | 0.80  | 4.40  | 0.80  | 0.00  |
|                 | 12 | 0.00                     | 6.20  | 6.20  | 0.41  | 9.09  | 3.72  | 0.83  | 0.00  | 0.00  | 6.61  | 0.00  | 15.12 | 0.00  | 0.00  | 11.98 | 2.89  | 7.02  | 4.55  | 0.00  | 0.41  | 1.65  | 1.65  | 1.24  | 0.00  | 0.00 | 0.00  | 0.00  | 0.41  | 0.00  | 0.00  |
|                 | 13 | 3.65                     | 0.00  | 3.32  | 5.32  | 0.00  | 9.30  | 0.33  | 0.00  | 3.99  | 9.30  | 0.00  | 0.33  | 37.63 | 5.98  | 0.66  | 0.00  | 0.00  | 3.99  | 2.99  | 0.33  | 0.33  | 0.00  | 5.05  | 0.00  | 6.31 | 0.66  | 0.00  | 0.00  | 0.00  | 0.00  |
|                 | 14 | 10.66                    | 0.00  | 0.93  | 3.70  | 0.00  | 0.46  | 4.63  | 2.31  | 4.17  | 2.31  | 2.31  | 0.00  | 15.45 | 30.70 | 0.46  | 0.00  | 0.00  | 0.00  | 5.56  | 0.00  | 0.00  | 0.00  | 0.00  | 3.24  | 0.00 | 4.17  | 0.00  | 0.00  | 0.46  | 0.46  |
|                 | 15 | 0.00                     | 4.67  | 3.27  | 5.61  | 0.00  | 0.47  | 1.40  | 0.93  | 0.00  | 10.28 | 0.00  | 7.48  | 0.93  | 0.00  | 10.11 | 0.00  | 0.00  | 4.21  | 0.00  | 8.88  | 3.27  | 0.47  | 15.90 | 0.00  | 0.00 | 0.47  | 0.00  | 0.47  | 0.00  | 0.00  |
|                 | 16 | 0.00                     | 0.51  | 0.51  | 0.00  | 6.57  | 2.02  | 3.54  | 0.00  | 5.56  | 0.00  | 2.02  | 10.10 | 0.00  | 0.51  | 0.00  | 13.94 | 5.56  | 0.00  | 0.51  | 0.00  | 0.00  | 10.61 | 0.00  | 0.00  | 0.51 | 0.00  | 4.55  | 3.03  | 0.00  | 0.00  |
|                 | 17 | 0.00                     | 0.00  | 0.60  | 0.00  | 4.82  | 15.66 | 0.00  | 0.00  | 4.82  | 0.60  | 0.00  | 7.23  | 0.00  | 0.00  | 0.00  | 1.20  | 45.10 | 8.43  | 0.00  | 0.00  | 0.00  | 0.00  | 0.00  | 0.00  | 7.23 | 0.00  | 6.02  | 0.00  | 0.00  | 0.00  |
|                 | 18 | 0.00                     | 0.60  | 5.36  | 0.00  | 0.00  | 4.76  | 0.60  | 0.00  | 1.79  | 8.93  | 0.00  | 2.98  | 8.93  | 0.00  | 4.76  | 0.60  | 8.33  | 34.10 | 0.00  | 0.60  | 0.00  | 0.00  | 6.55  | 0.00  | 7.14 | 0.00  | 0.00  | 0.00  | 0.00  | 0.00  |
|                 | 19 | 7.52                     | 0.44  | 0.00  | 0.00  | 0.44  | 7.52  | 0.44  | 0.00  | 3.54  | 2.21  | 3.54  | 0.00  | 6.64  | 6.19  | 0.00  | 0.44  | 0.00  | 0.00  | 32.83 | 0.00  | 0.00  | 0.00  | 0.00  | 1.77  | 2.21 | 0.00  | 2.21  | 2.21  | 0.00  | 0.00  |
|                 | 20 | 0.00                     | 1.17  | 0.00  | 8.19  | 0.00  | 0.58  | 3.51  | 0.00  | 1.75  | 0.00  | 0.00  | 0.00  | 0.00  | 0.00  | 4.09  | 0.00  | 0.00  | 0.00  | 0.00  | 30.94 | 5.26  | 0.00  | 11.70 | 0.00  | 0.00 | 10.70 | 0.00  | 0.00  | 7.02  | 0.00  |
|                 | 21 | 0.00                     | 7.66  | 0.48  | 2.87  | 0.48  | 0.00  | 2.87  | 10.00 | 0.00  | 0.96  | 2.39  | 1.44  | 0.00  | 0.00  | 6.70  | 0.00  | 0.00  | 0.48  | 0.00  | 9.09  | 36.84 | 7.66  | 0.48  | 0.00  | 0.00 | 0.48  | 0.00  | 0.00  | 3.83  | 5.26  |
|                 | 22 | 0.00                     | 5.41  | 0.00  | 0.00  | 8.56  | 0.00  | 7.21  | 0.90  | 0.45  | 0.00  | 2.70  | 6.76  | 0.00  | 0.00  | 1.35  | 7.66  | 0.00  | 0.00  | 0.00  | 0.45  | 6.76  | 42.94 | 0.45  | 0.00  | 0.00 | 0.00  | 3.60  | 5.41  | 0.00  | 0.00  |
|                 | 23 | 0.53                     | 0.00  | 3.21  | 11.76 | 0.00  | 0.00  | 0.00  | 1.07  | 0.53  | 2.67  | 0.00  | 0.00  | 18.07 | 6.95  | 9.09  | 0.00  | 0.00  | 2.67  | 0.53  | 3.74  | 0.00  | 0.00  | 15.81 | 0.00  | 0.00 | 5.88  | 0.00  | 0.00  | 0.00  | 0.53  |
|                 | 24 | 5.93                     | 0.74  | 0.00  | 0.74  | 0.74  | 0.00  | 7.41  | 15.11 | 0.00  | 0.00  | 11.85 | 0.00  | 0.00  | 8.15  | 0.00  | 0.74  | 0.00  | 0.74  | 3.70  | 0.00  | 0.00  | 0.74  | 0.00  | 17.94 | 0.00 | 0.74  | 0.00  | 1.48  | 5.93  | 0.00  |
|                 | 25 | 1.17                     | 0.00  | 0.58  | 0.00  | 11.70 | 0.00  | 0.00  | 6.43  | 0.00  | 0.00  | 0.00  | 0.00  | 9.94  | 0.00  | 0.00  | 0.58  | 1.17  | 4.09  | 9.36  | 0.00  | 0.00  | 0.00  | 0.00  | 0.00  | 0.00 | 40.25 | 0.00  | 5.26  | 0.00  | 0.00  |
|                 | 26 | 0.78                     | 0.00  | 0.00  | 17.06 | 0.00  | 0.00  | 0.00  | 6.98  | 0.00  | 3.10  | 0.78  | 0.00  | 5.43  | 10.70 | 0.78  | 0.00  | 0.00  | 0.78  | 0.00  | 6.98  | 0.78  | 0.00  | 2.33  | 6.98  | 0.00 | 27.15 | 0.00  | 0.00  | 0.78  | 4.65  |
|                 | 27 | 0.00                     | 0.00  | 0.00  | 0.00  | 2.88  | 4.81  | 0.00  | 0.00  | 9.62  | 0.00  | 1.92  | 0.00  | 0.00  | 0.00  | 0.00  | 10.66 | 4.81  | 0.00  | 10.66 | 0.00  | 0.00  | 0.00  | 0.00  | 0.00  | 2.88 | 0.00  | 40.25 | 7.69  | 0.00  | 0.00  |
|                 | 28 | 0.00                     | 0.00  | 0.00  | 0.00  | 0.00  | 0.66  | 4.61  | 0.00  | 3.29  | 0.00  | 8.55  | 0.00  | 0.00  | 0.00  | 0.00  | 3.35  | 0.00  | 0.00  | 0.66  | 0.00  | 0.00  | 6.58  | 0.00  | 6.58  | 0.00 | 0.00  | 2.63  | 15.26 | 7.24  | 0.00  |
|                 | 29 | 0.00                     | 0.65  | 0.00  | 0.00  | 0.65  | 0.00  | 6.45  | 5.16  | 0.00  | 0.00  | 3.23  | 0.00  | 0.00  | 0.00  | 0.00  | 0.00  | 0.00  | 0.00  | 0.65  | 0.00  | 9.03  | 6.45  | 0.00  | 7.10  | 0.00 | 0.00  | 0.00  | 5.81  | 11.61 | 3.23  |
|                 | 30 | 0.00                     | 1.06  | 0.00  | 2.13  | 0.00  | 0.00  | 0.00  | 15.66 | 0.00  | 0.00  | 1.06  | 0.00  | 0.00  | 1.06  | 0.00  | 0.00  | 0.00  | 0.00  | 0.00  | 3.19  | 7.45  | 0.00  | 1.06  | 6.38  | 0.00 | 11.70 | 0.00  | 0.00  | 4.28  | 46.61 |

Figure A.9: Long-term probability of occurrence of a weather pattern (columns 1 to 30) given the weather pattern in the previous day (rows 1 to 30) in the UK in spring.

|                 |    | Weather Pattern next day |       |       |       |       |       |       |       |       |       |       |       |       |       |       |       |       |       |       |       |       |      |       |      |       |       |       |       |       |      |      |
|-----------------|----|--------------------------|-------|-------|-------|-------|-------|-------|-------|-------|-------|-------|-------|-------|-------|-------|-------|-------|-------|-------|-------|-------|------|-------|------|-------|-------|-------|-------|-------|------|------|
|                 |    | 1                        | 2     | 3     | 4     | 5     | 6     | 7     | 8     | 9     | 10    | 11    | 12    | 13    | 14    | 15    | 16    | 17    | 18    | 19    | 20    | 21    | 22   | 23    | 24   | 25    | 26    | 27    | 28    | 29    | 30   |      |
| Weather Pattern | 1  | 56.73                    | 5.73  | 7.43  | 5.94  | 3.40  | 4.46  | 7.64  | 5.52  | 2.55  | 7.64  | 2.34  | 0.42  | 3.18  | 5.10  | 0.21  | 0.00  | 0.00  | 0.00  | 1.49  | 0.21  | 0.00  | 0.00 | 0.00  | 0.00 | 0.00  | 0.00  | 0.00  | 0.00  | 0.00  | 0.00 |      |
|                 | 2  | 6.35                     | 33.65 | 7.76  | 7.29  | 4.47  | 0.24  | 4.47  | 8.00  | 0.00  | 5.41  | 1.41  | 4.47  | 0.24  | 0.24  | 3.76  | 0.00  | 0.00  | 0.00  | 0.00  | 1.18  | 7.76  | 2.59 | 0.47  | 0.00 | 0.00  | 0.24  | 0.00  | 0.00  | 0.00  | 0.00 |      |
|                 | 3  | 6.02                     | 10.12 | 32.03 | 3.86  | 8.67  | 7.71  | 5.54  | 0.72  | 5.78  | 5.06  | 0.48  | 5.54  | 2.65  | 0.48  | 1.93  | 1.93  | 0.48  | 0.24  | 0.00  | 0.00  | 0.24  | 0.24 | 0.24  | 0.00 | 0.00  | 0.00  | 0.00  | 0.00  | 0.00  | 0.00 |      |
|                 | 4  | 7.34                     | 7.13  | 9.07  | 16.34 | 0.43  | 0.43  | 5.40  | 8.21  | 1.94  | 4.32  | 0.43  | 0.65  | 3.02  | 6.26  | 2.59  | 0.00  | 0.00  | 0.00  | 0.00  | 2.38  | 1.51  | 0.22 | 1.73  | 0.00 | 0.00  | 2.38  | 0.00  | 0.00  | 0.00  | 0.22 |      |
|                 | 5  | 6.25                     | 7.81  | 3.57  | 0.00  | 41.52 | 8.93  | 4.69  | 1.34  | 3.13  | 2.01  | 5.80  | 3.35  | 0.22  | 0.00  | 0.00  | 4.69  | 0.67  | 0.00  | 1.34  | 0.00  | 0.22  | 4.02 | 0.00  | 0.22 | 0.00  | 0.00  | 0.00  | 0.00  | 0.22  | 0.00 |      |
|                 | 6  | 4.02                     | 1.48  | 4.44  | 0.21  | 9.73  | 49.26 | 0.00  | 0.00  | 4.86  | 8.03  | 0.00  | 3.81  | 3.59  | 0.00  | 0.00  | 0.42  | 1.90  | 2.33  | 1.48  | 0.00  | 0.00  | 0.00 | 0.00  | 0.00 | 3.59  | 0.00  | 0.85  | 0.00  | 0.00  | 0.00 |      |
|                 | 7  | 1.70                     | 7.22  | 5.52  | 1.27  | 3.40  | 0.21  | 42.46 | 8.07  | 2.34  | 0.00  | 10.62 | 1.49  | 0.00  | 1.27  | 0.21  | 1.06  | 0.00  | 0.00  | 0.00  | 0.00  | 2.97  | 5.31 | 0.00  | 1.49 | 0.00  | 0.21  | 0.00  | 0.64  | 2.34  | 0.21 |      |
|                 | 8  | 5.38                     | 3.85  | 0.77  | 14.18 | 0.00  | 0.00  | 9.74  | 39.46 | 0.26  | 0.51  | 2.56  | 0.26  | 0.51  | 6.15  | 0.26  | 0.00  | 0.00  | 0.00  | 0.00  | 1.79  | 3.85  | 0.51 | 0.00  | 5.38 | 0.00  | 2.82  | 0.00  | 0.00  | 0.51  | 2.05 |      |
|                 | 9  | 5.11                     | 0.30  | 3.00  | 0.30  | 6.31  | 7.21  | 6.91  | 0.30  | 47.46 | 0.00  | 2.40  | 1.50  | 1.80  | 0.30  | 0.00  | 7.51  | 1.80  | 0.30  | 3.90  | 0.60  | 0.00  | 0.00 | 0.00  | 0.00 | 1.20  | 0.00  | 1.80  | 0.00  | 0.00  | 0.00 |      |
|                 | 10 | 5.18                     | 3.37  | 9.59  | 8.81  | 0.78  | 4.92  | 0.00  | 0.78  | 0.00  | 41.10 | 0.00  | 2.33  | 6.48  | 0.52  | 5.44  | 0.00  | 0.26  | 1.81  | 0.00  | 1.04  | 0.52  | 0.00 | 6.22  | 0.00 | 0.00  | 0.78  | 0.00  | 0.00  | 0.00  | 0.00 |      |
|                 | 11 | 8.20                     | 2.05  | 0.00  | 0.41  | 6.15  | 0.41  | 13.52 | 4.51  | 5.74  | 0.00  | 19.75 | 0.00  | 0.41  | 3.69  | 0.00  | 0.82  | 0.00  | 0.00  | 4.92  | 0.00  | 0.00  | 2.05 | 0.00  | 4.92 | 0.00  | 0.00  | 0.00  | 1.23  | 1.23  | 0.00 |      |
|                 | 12 | 0.00                     | 7.23  | 6.81  | 0.43  | 11.16 | 9.79  | 0.00  | 0.00  | 0.43  | 7.66  | 0.43  | 10.46 | 0.43  | 0.00  | 2.13  | 3.83  | 3.40  | 2.98  | 0.00  | 0.00  | 1.28  | 2.13 | 0.00  | 0.00 | 0.00  | 0.00  | 0.00  | 0.00  | 0.00  | 0.00 |      |
|                 | 13 | 6.46                     | 0.00  | 6.08  | 5.32  | 0.38  | 8.37  | 0.38  | 0.00  | 7.98  | 11.41 | 0.00  | 0.38  | 41.49 | 4.94  | 0.00  | 0.00  | 0.38  | 1.90  | 1.52  | 0.00  | 0.38  | 0.00 | 0.00  | 0.00 | 2.66  | 0.00  | 0.00  | 0.00  | 0.00  | 0.00 |      |
|                 | 14 | 18.20                    | 0.47  | 0.00  | 13.06 | 0.00  | 0.93  | 5.14  | 3.27  | 3.74  | 1.87  | 0.00  | 0.00  | 13.25 | 12.71 | 0.00  | 0.00  | 0.00  | 0.00  | 3.74  | 0.00  | 0.00  | 0.00 | 0.47  | 0.93 | 0.00  | 1.87  | 0.00  | 0.00  | 0.00  | 0.00 |      |
|                 | 15 | 0.00                     | 10.20 | 7.69  | 11.11 | 0.00  | 0.00  | 1.71  | 0.85  | 0.00  | 8.55  | 0.00  | 3.40  | 1.71  | 0.00  | 43.96 | 0.00  | 0.00  | 1.71  | 0.00  | 11.11 | 5.98  | 0.85 | 5.13  | 0.00 | 0.00  | 0.00  | 0.00  | 0.00  | 0.00  | 0.00 |      |
|                 | 16 | 0.00                     | 0.56  | 1.12  | 0.00  | 19.00 | 1.12  | 3.37  | 0.56  | 3.93  | 0.00  | 0.56  | 5.62  | 0.00  | 0.00  | 0.00  | 48.89 | 1.69  | 0.00  | 0.00  | 0.00  | 0.00  | 0.00 | 6.74  | 0.00 | 0.00  | 0.00  | 0.00  | 3.93  | 2.81  | 0.00 |      |
|                 | 17 | 0.00                     | 0.00  | 2.82  | 0.00  | 8.45  | 12.48 | 0.00  | 0.00  | 1.41  | 0.00  | 0.00  | 5.63  | 1.41  | 0.00  | 0.00  | 9.86  | 46.42 | 5.63  | 0.00  | 0.00  | 0.00  | 0.00 | 0.00  | 0.00 | 7.04  | 0.00  | 1.41  | 0.00  | 0.00  | 0.00 |      |
|                 | 18 | 0.00                     | 1.64  | 18.20 | 0.00  | 0.00  | 13.21 | 0.00  | 1.64  | 3.28  | 8.20  | 0.00  | 4.92  | 8.20  | 0.00  | 3.28  | 0.00  | 1.64  | 18.20 | 0.00  | 0.00  | 0.00  | 0.00 | 0.00  | 0.00 | 8.20  | 0.00  | 0.00  | 0.00  | 0.00  | 0.00 |      |
|                 | 19 | 12.48                    | 0.00  | 0.00  | 0.00  | 2.52  | 7.56  | 0.84  | 0.00  | 9.24  | 0.84  | 5.88  | 0.00  | 3.36  | 4.20  | 0.00  | 0.84  | 0.00  | 0.00  | 45.28 | 0.00  | 0.00  | 0.00 | 0.00  | 1.68 | 4.20  | 0.00  | 0.00  | 0.84  | 0.00  | 0.00 |      |
|                 | 20 | 0.00                     | 3.61  | 0.00  | 32.59 | 0.00  | 0.00  | 0.00  | 7.23  | 0.00  | 1.20  | 0.00  | 0.00  | 1.20  | 0.00  | 8.43  | 0.00  | 0.00  | 0.00  | 0.00  | 38.10 | 4.82  | 0.00 | 3.61  | 0.00 | 0.00  | 10.40 | 0.00  | 0.00  | 0.00  | 2.41 | 0.00 |
|                 | 21 | 0.00                     | 12.48 | 0.55  | 4.40  | 0.00  | 0.55  | 2.20  | 12.48 | 0.00  | 1.10  | 0.55  | 1.65  | 0.00  | 0.00  | 6.59  | 0.00  | 0.00  | 0.00  | 0.00  | 7.69  | 99.56 | 3.30 | 0.00  | 0.00 | 0.00  | 0.00  | 0.00  | 0.00  | 2.20  | 4.40 | 0.00 |
|                 | 22 | 0.67                     | 8.00  | 0.67  | 0.67  | 11.13 | 0.67  | 10.67 | 2.00  | 0.67  | 0.00  | 3.33  | 3.33  | 0.00  | 0.00  | 1.33  | 6.67  | 0.00  | 0.00  | 0.00  | 8.00  | 40.00 | 0.00 | 0.00  | 0.00 | 0.00  | 0.00  | 0.00  | 1.33  | 0.67  | 0.00 |      |
|                 | 23 | 0.00                     | 0.00  | 5.08  | 22.00 | 0.00  | 3.39  | 0.00  | 1.69  | 0.00  | 6.78  | 0.00  | 1.69  | 22.00 | 5.08  | 1.69  | 0.00  | 0.00  | 3.39  | 0.00  | 5.08  | 0.00  | 0.00 | 22.00 | 0.00 | 0.00  | 0.00  | 0.00  | 0.00  | 0.00  | 0.00 | 0.00 |
|                 | 24 | 6.90                     | 0.00  | 0.00  | 2.30  | 0.00  | 0.00  | 9.20  | 10.00 | 0.00  | 0.00  | 6.90  | 0.00  | 0.00  | 13.76 | 0.00  | 0.00  | 0.00  | 0.00  | 0.00  | 1.15  | 0.00  | 0.00 | 13.76 | 0.00 | 4.60  | 0.00  | 2.30  | 1.15  | 2.30  | 0.00 |      |
|                 | 25 | 1.14                     | 0.00  | 0.00  | 0.00  | 0.00  | 15.00 | 0.00  | 0.00  | 12.00 | 0.00  | 0.00  | 0.00  | 0.00  | 5.68  | 1.14  | 0.00  | 1.14  | 7.95  | 2.27  | 5.68  | 0.00  | 0.00 | 0.00  | 0.00 | 45.45 | 0.00  | 1.14  | 0.00  | 0.00  | 0.00 |      |
|                 | 26 | 0.00                     | 0.00  | 0.00  | 26.26 | 0.00  | 0.00  | 2.99  | 7.45  | 0.00  | 2.99  | 0.00  | 0.00  | 0.00  | 17.91 | 0.00  | 0.00  | 2.99  | 0.00  | 0.00  | 4.48  | 0.00  | 0.00 | 0.00  | 4.48 | 0.00  | 26.26 | 0.00  | 0.00  | 0.00  | 2.99 | 0.00 |
|                 | 27 | 0.00                     | 0.00  | 3.33  | 0.00  | 3.33  | 10.00 | 0.00  | 0.00  | 15.00 | 0.00  | 3.33  | 0.00  | 0.00  | 0.00  | 0.00  | 3.33  | 0.00  | 0.00  | 3.33  | 0.00  | 0.00  | 0.00 | 0.00  | 0.00 | 0.00  | 15.00 | 0.00  | 40.00 | 6.67  | 0.00 | 0.00 |
|                 | 28 | 0.00                     | 0.00  | 0.00  | 0.00  | 0.00  | 0.00  | 0.00  | 0.00  | 0.00  | 0.00  | 17.77 | 0.00  | 0.00  | 0.00  | 0.00  | 0.00  | 0.00  | 0.00  | 6.06  | 0.00  | 6.06  | 0.00 | 9.09  | 0.00 | 0.00  | 0.00  | 18.40 | 3.03  | 0.00  | 0.00 | 0.00 |
|                 | 29 | 0.00                     | 0.00  | 0.00  | 0.00  | 0.00  | 0.00  | 4.35  | 15.42 | 0.00  | 0.00  | 2.17  | 0.00  | 0.00  | 0.00  | 0.00  | 0.00  | 0.00  | 0.00  | 0.00  | 13.00 | 2.17  | 0.00 | 15.00 | 0.00 | 0.00  | 0.00  | 0.00  | 47.83 | 2.17  | 0.00 | 0.00 |
|                 | 30 | 0.00                     | 0.00  | 0.00  | 4.88  | 0.00  | 0.00  | 10.31 | 0.00  | 0.00  | 0.00  | 0.00  | 0.00  | 0.00  | 0.00  | 0.00  | 0.00  | 0.00  | 0.00  | 0.00  | 2.44  | 7.32  | 0.00 | 4.88  | 0.00 | 17.07 | 0.00  | 0.00  | 2.44  | 41.46 | 0.00 | 0.00 |

Figure A.10: Long-term probability of occurrence of a weather pattern (columns 1 to 30) given the weather pattern in the previous day (rows 1 to 30) in the UK in summer.



|                 |    | Weather Pattern next day |       |       |       |       |       |       |       |       |       |       |       |       |       |       |       |       |       |       |       |       |       |       |       |       |       |       |       |       |       |
|-----------------|----|--------------------------|-------|-------|-------|-------|-------|-------|-------|-------|-------|-------|-------|-------|-------|-------|-------|-------|-------|-------|-------|-------|-------|-------|-------|-------|-------|-------|-------|-------|-------|
|                 |    | 1                        | 2     | 3     | 4     | 5     | 6     | 7     | 8     | 9     | 10    | 11    | 12    | 13    | 14    | 15    | 16    | 17    | 18    | 19    | 20    | 21    | 22    | 23    | 24    | 25    | 26    | 27    | 28    | 29    | 30    |
| Weather Pattern | 1  | 16.00                    | 10.34 | 1.15  | 1.15  | 3.45  | 5.75  | 2.30  | 6.90  | 3.45  | 16.30 | 2.30  | 4.60  | 2.30  | 4.60  | 1.15  | 0.00  | 1.15  | 0.00  | 4.60  | 1.15  | 0.00  | 2.30  | 0.00  | 2.30  | 1.15  | 2.30  | 0.00  | 0.00  | 0.00  | 1.15  |
|                 | 2  | 2.70                     | 16.30 | 2.70  | 2.70  | 2.70  | 0.00  | 0.68  | 6.08  | 0.00  | 4.05  | 8.78  | 4.73  | 0.00  | 0.00  | 11.19 | 0.00  | 0.00  | 0.00  | 0.00  | 4.73  | 10.27 | 5.41  | 0.68  | 0.00  | 0.00  | 1.35  | 0.00  | 0.68  | 0.00  | 2.03  |
|                 | 3  | 3.23                     | 1.61  | 16.10 | 2.42  | 2.42  | 2.42  | 5.65  | 0.00  | 8.06  | 1.61  | 0.00  | 16.30 | 2.42  | 4.84  | 8.87  | 7.26  | 4.03  | 4.03  | 1.61  | 1.61  | 1.61  | 2.42  | 0.00  | 0.00  | 0.81  | 0.81  | 0.00  | 0.00  | 0.00  | 0.00  |
|                 | 4  | 3.08                     | 3.08  | 6.15  | 16.30 | 0.00  | 0.00  | 9.23  | 6.92  | 3.08  | 2.31  | 2.31  | 1.54  | 6.15  | 5.38  | 3.85  | 0.00  | 0.00  | 1.54  | 0.77  | 4.62  | 5.38  | 0.77  | 4.62  | 0.00  | 0.00  | 4.62  | 0.00  | 0.00  | 0.00  | 3.08  |
|                 | 5  | 1.37                     | 2.74  | 0.00  | 0.68  | 12.68 | 8.90  | 2.05  | 0.00  | 1.37  | 2.05  | 6.85  | 16.30 | 0.00  | 0.00  | 0.00  | 6.85  | 2.74  | 0.00  | 3.42  | 0.00  | 2.05  | 16.30 | 0.00  | 0.00  | 0.00  | 0.00  | 2.05  | 0.68  | 0.68  | 0.00  |
|                 | 6  | 1.59                     | 1.06  | 3.17  | 0.53  | 6.88  | 12.31 | 0.53  | 0.00  | 3.17  | 16.30 | 0.00  | 16.30 | 7.41  | 0.00  | 1.06  | 3.17  | 5.29  | 7.94  | 0.53  | 0.53  | 0.00  | 0.00  | 0.53  | 0.00  | 4.76  | 0.00  | 1.06  | 0.00  | 0.00  | 0.00  |
|                 | 7  | 0.00                     | 1.57  | 0.00  | 5.51  | 1.57  | 0.00  | 16.30 | 3.94  | 4.72  | 0.00  | 6.30  | 3.94  | 0.00  | 3.94  | 2.36  | 3.94  | 0.00  | 0.00  | 0.00  | 1.57  | 9.45  | 17.10 | 0.79  | 1.57  | 0.00  | 0.79  | 0.00  | 3.94  | 4.72  | 2.36  |
|                 | 8  | 2.11                     | 7.75  | 0.00  | 7.75  | 0.00  | 0.70  | 6.34  | 16.30 | 0.00  | 2.11  | 6.34  | 0.00  | 0.70  | 6.34  | 0.70  | 0.00  | 0.00  | 0.00  | 2.82  | 1.41  | 8.45  | 1.41  | 0.00  | 9.86  | 0.00  | 5.63  | 0.00  | 0.00  | 6.34  | 3.52  |
|                 | 9  | 1.28                     | 0.64  | 3.85  | 0.00  | 5.77  | 4.49  | 1.92  | 0.00  | 16.30 | 0.64  | 3.21  | 3.85  | 0.64  | 2.56  | 0.00  | 16.30 | 7.69  | 1.28  | 3.85  | 0.00  | 0.00  | 1.28  | 0.00  | 0.00  | 6.41  | 0.00  | 8.97  | 1.92  | 0.00  | 0.00  |
|                 | 10 | 0.48                     | 4.35  | 3.38  | 3.86  | 0.48  | 3.86  | 0.00  | 1.45  | 0.00  | 16.30 | 0.48  | 1.93  | 16.30 | 0.48  | 1.11  | 0.48  | 1.93  | 6.76  | 0.00  | 6.28  | 0.48  | 0.00  | 16.30 | 0.48  | 1.93  | 1.45  | 0.00  | 0.00  | 0.00  | 0.48  |
|                 | 11 | 3.36                     | 4.03  | 0.67  | 0.67  | 5.37  | 0.67  | 6.04  | 4.03  | 1.34  | 0.67  | 16.30 | 0.00  | 0.00  | 2.01  | 0.00  | 0.67  | 0.00  | 0.00  | 16.30 | 0.67  | 2.01  | 4.70  | 0.00  | 8.72  | 0.00  | 0.00  | 2.01  | 3.36  | 4.70  | 0.00  |
|                 | 12 | 1.12                     | 6.32  | 4.83  | 0.00  | 1.49  | 1.49  | 1.49  | 0.00  | 0.74  | 4.09  | 0.00  | 16.30 | 0.37  | 0.00  | 16.30 | 2.97  | 7.81  | 8.18  | 0.00  | 2.60  | 1.86  | 4.09  | 1.12  | 0.37  | 0.00  | 0.00  | 0.37  | 0.00  | 0.37  | 0.00  |
|                 | 13 | 2.80                     | 0.62  | 1.86  | 2.48  | 0.62  | 5.90  | 0.62  | 0.00  | 3.11  | 7.45  | 0.00  | 1.55  | 16.30 | 6.83  | 1.24  | 0.62  | 0.31  | 4.66  | 4.66  | 0.93  | 0.00  | 0.00  | 8.70  | 0.00  | 9.32  | 1.24  | 0.31  | 0.00  | 0.00  | 0.00  |
|                 | 14 | 3.69                     | 0.41  | 2.46  | 0.82  | 0.41  | 2.05  | 2.05  | 4.51  | 8.20  | 4.10  | 0.82  | 0.00  | 16.30 | 16.30 | 0.00  | 0.00  | 0.00  | 0.00  | 16.30 | 0.41  | 0.00  | 0.00  | 1.23  | 5.33  | 2.05  | 2.05  | 0.41  | 0.82  | 0.00  | 0.41  |
|                 | 15 | 0.00                     | 3.14  | 2.79  | 2.44  | 0.70  | 0.35  | 0.35  | 1.39  | 0.35  | 9.06  | 0.00  | 5.23  | 0.00  | 0.35  | 16.30 | 0.00  | 0.00  | 4.88  | 0.00  | 16.30 | 5.92  | 1.39  | 16.30 | 0.00  | 0.00  | 0.70  | 0.00  | 0.00  | 0.00  | 0.70  |
|                 | 16 | 0.00                     | 0.84  | 0.00  | 0.42  | 5.86  | 0.84  | 3.35  | 0.00  | 2.51  | 0.00  | 0.84  | 16.30 | 0.00  | 0.00  | 0.84  | 16.30 | 7.95  | 0.42  | 0.00  | 0.00  | 0.00  | 16.30 | 0.00  | 0.00  | 0.00  | 0.00  | 5.44  | 1.67  | 0.00  | 0.00  |
|                 | 17 | 0.00                     | 0.37  | 1.86  | 0.00  | 1.49  | 2.97  | 0.00  | 0.00  | 1.86  | 0.37  | 0.00  | 7.43  | 0.37  | 0.00  | 7.4   | 5.95  | 12.00 | 8.55  | 0.00  | 0.00  | 0.00  | 0.00  | 0.00  | 8.55  | 0.00  | 7.06  | 0.37  | 0.00  | 0.00  | 0.00  |
|                 | 18 | 0.00                     | 0.00  | 3.59  | 1.20  | 0.40  | 2.39  | 0.00  | 0.00  | 2.39  | 2.39  | 0.00  | 5.18  | 16.30 | 0.80  | 7.17  | 1.20  | 7.57  | 12.40 | 0.00  | 0.00  | 0.40  | 0.40  | 8.37  | 0.00  | 7.17  | 0.00  | 0.40  | 0.00  | 0.00  | 0.00  |
|                 | 19 | 4.98                     | 0.77  | 0.38  | 0.00  | 3.83  | 9.20  | 0.00  | 0.38  | 1.92  | 1.92  | 3.83  | 0.38  | 8.05  | 5.75  | 0.38  | 0.00  | 0.00  | 0.00  | 16.30 | 0.00  | 0.00  | 0.38  | 0.00  | 1.15  | 6.51  | 0.00  | 3.83  | 3.07  | 0.38  | 0.00  |
|                 | 20 | 0.00                     | 0.00  | 1.77  | 5.31  | 0.00  | 0.00  | 0.44  | 0.88  | 0.00  | 0.88  | 0.44  | 1.33  | 0.44  | 0.88  | 7.96  | 0.00  | 0.00  | 0.00  | 0.00  | 16.30 | 4.87  | 0.00  | 16.30 | 1.33  | 0.00  | 16.30 | 0.44  | 0.00  | 0.00  | 8.85  |
|                 | 21 | 0.00                     | 5.65  | 0.71  | 1.06  | 0.35  | 0.00  | 1.77  | 4.95  | 0.35  | 0.00  | 0.35  | 0.71  | 0.00  | 0.00  | 7.77  | 0.35  | 0.00  | 0.00  | 0.00  | 9.89  | 16.30 | 4.24  | 0.00  | 0.00  | 0.00  | 1.41  | 0.00  | 0.00  | 6.71  | 16.30 |
|                 | 22 | 0.39                     | 5.45  | 0.00  | 0.00  | 4.28  | 0.00  | 4.28  | 0.78  | 0.00  | 0.00  | 3.50  | 5.06  | 0.00  | 0.00  | 1.17  | 7.00  | 0.78  | 0.00  | 0.39  | 0.39  | 16.30 | 16.30 | 0.00  | 0.00  | 0.00  | 0.00  | 0.78  | 3.50  | 8.95  | 0.00  |
|                 | 23 | 0.00                     | 0.39  | 3.88  | 4.65  | 0.00  | 0.00  | 0.39  | 1.55  | 0.39  | 1.94  | 0.39  | 0.00  | 16.30 | 16.30 | 8.91  | 0.00  | 0.00  | 5.04  | 0.00  | 4.26  | 0.00  | 0.00  | 16.30 | 0.00  | 0.39  | 6.59  | 0.00  | 0.00  | 0.00  | 0.39  |
|                 | 24 | 4.44                     | 1.33  | 0.00  | 0.44  | 0.44  | 0.00  | 2.22  | 5.33  | 0.89  | 0.44  | 6.22  | 0.00  | 0.00  | 16.30 | 0.00  | 0.89  | 0.00  | 0.00  | 9.78  | 0.44  | 0.44  | 0.44  | 0.00  | 16.30 | 0.00  | 1.78  | 0.00  | 1.78  | 4.89  | 2.67  |
|                 | 25 | 0.00                     | 0.00  | 0.00  | 0.00  | 0.39  | 8.14  | 0.00  | 0.00  | 4.65  | 1.55  | 0.00  | 0.39  | 4.26  | 0.00  | 0.00  | 0.39  | 6.98  | 16.30 | 5.43  | 0.00  | 0.39  | 0.00  | 0.39  | 0.00  | 16.30 | 0.00  | 5.04  | 0.00  | 0.00  | 0.00  |
|                 | 26 | 0.46                     | 0.00  | 0.91  | 6.39  | 0.00  | 0.46  | 1.83  | 4.11  | 0.00  | 1.83  | 0.00  | 0.00  | 4.11  | 16.30 | 1.83  | 0.00  | 0.00  | 0.00  | 0.00  | 5.48  | 0.46  | 0.00  | 2.74  | 8.22  | 0.00  | 16.30 | 0.00  | 0.00  | 0.00  | 8.22  |
|                 | 27 | 0.00                     | 0.00  | 0.00  | 0.00  | 1.37  | 3.20  | 0.00  | 0.00  | 2.28  | 0.46  | 0.00  | 0.91  | 0.00  | 0.00  | 0.46  | 16.30 | 5.48  | 0.46  | 4.11  | 0.00  | 0.00  | 1.37  | 0.00  | 0.00  | 4.57  | 0.00  | 16.30 | 4.11  | 0.46  | 0.00  |
|                 | 28 | 0.00                     | 0.66  | 0.00  | 0.00  | 0.66  | 0.66  | 0.00  | 0.00  | 1.99  | 0.00  | 3.31  | 0.00  | 0.00  | 0.00  | 0.00  | 2.65  | 0.00  | 0.00  | 5.96  | 0.00  | 0.66  | 7.95  | 0.00  | 3.31  | 0.00  | 0.66  | 3.31  | 16.30 | 9.27  | 0.00  |
|                 | 29 | 0.00                     | 0.45  | 0.45  | 0.00  | 0.00  | 0.00  | 1.81  | 2.71  | 0.00  | 0.00  | 2.26  | 0.00  | 0.00  | 0.00  | 0.45  | 0.45  | 0.00  | 0.00  | 0.90  | 0.00  | 5.43  | 7.24  | 0.00  | 16.30 | 0.00  | 0.00  | 0.00  | 4.52  | 16.30 | 9.50  |
|                 | 30 | 0.00                     | 0.44  | 0.00  | 0.44  | 0.00  | 0.00  | 2.22  | 4.89  | 0.00  | 0.00  | 0.00  | 0.00  | 0.00  | 0.00  | 0.00  | 0.44  | 0.44  | 0.00  | 0.00  | 4.00  | 6.67  | 0.44  | 0.00  | 16.30 | 0.00  | 16.30 | 0.00  | 0.00  | 6.22  | 16.30 |

Figure A.11: Long-term probability of occurrence of a weather pattern (columns 1 to 30) given the weather pattern in the previous day (rows 1 to 30) in the UK in fall.

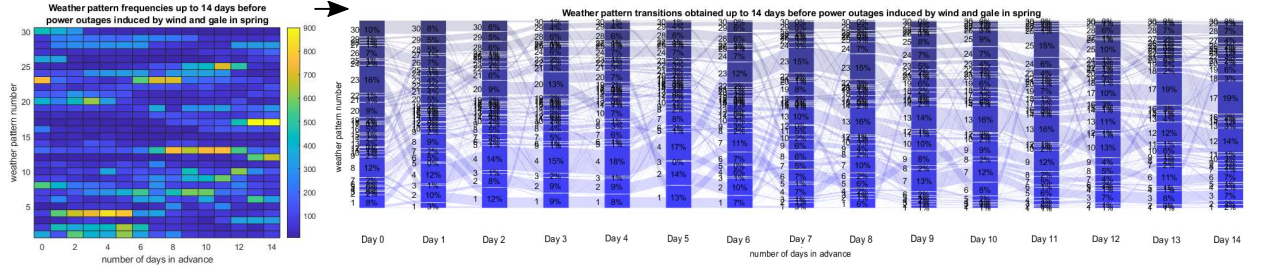

(a) Top 1 spring: wind and gale

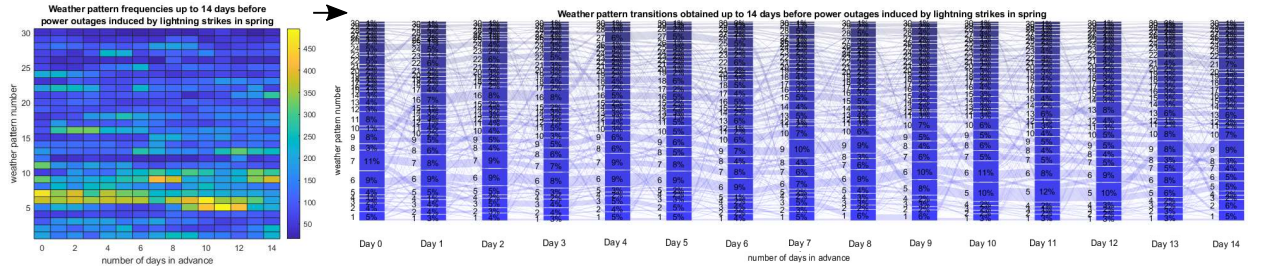

(b) Top 2 spring: lightning strikes

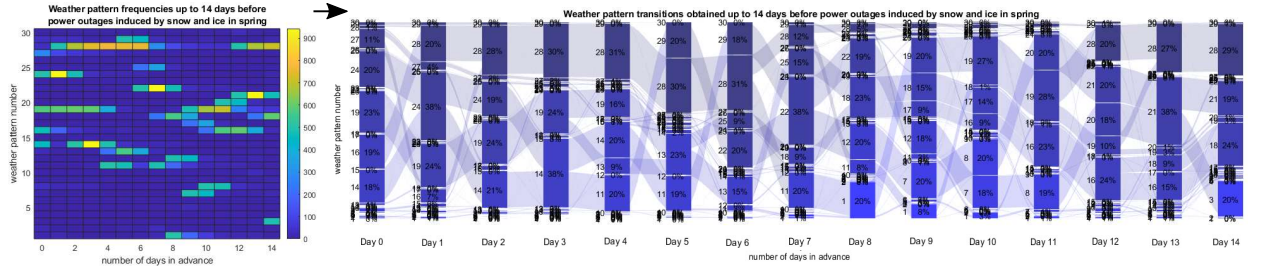

(c) Top 3 spring: snow and ice

Figure A.12: Frequency of occurrence of weather patterns (on the left) and weather pattern transitions (on the right) up to 2 weeks ahead of the three most common causes of weather-induced power outages in spring in the UK from 2010 to 2019.



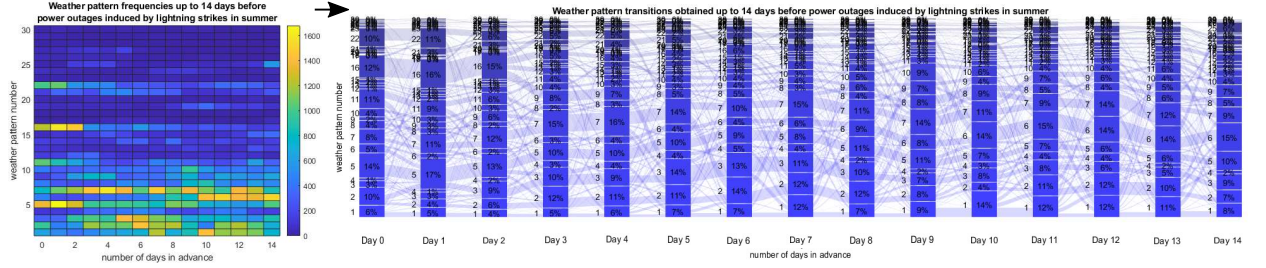

(a) Top 1 summer: lightning strikes

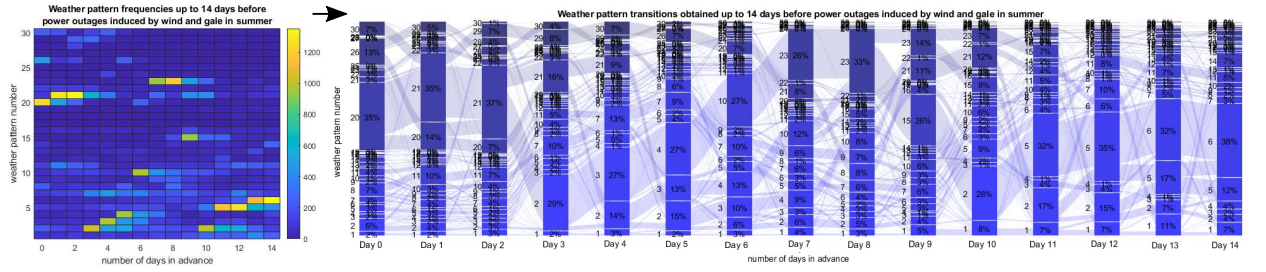

(b) Top 2 summer: wind and gale

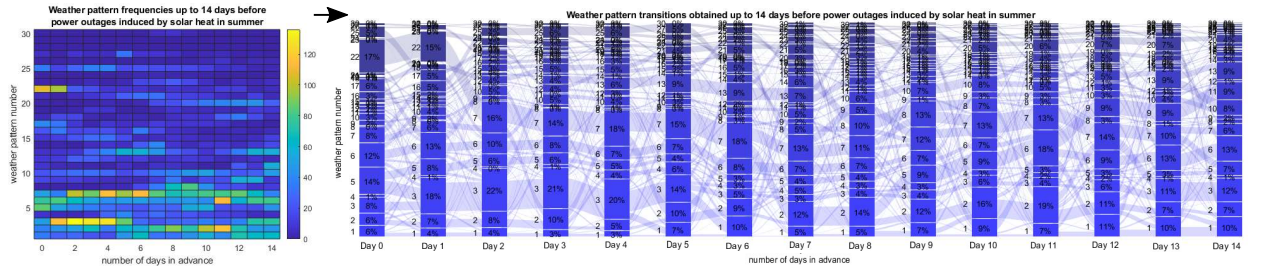

(c) Top 3 summer: solar heat

Figure A.13: Frequency of occurrence of weather patterns (on the left) and weather pattern transitions (on the right) up to 2 weeks ahead of the three most common causes of weather-induced power outages in summer in the UK from 2010 to 2019.

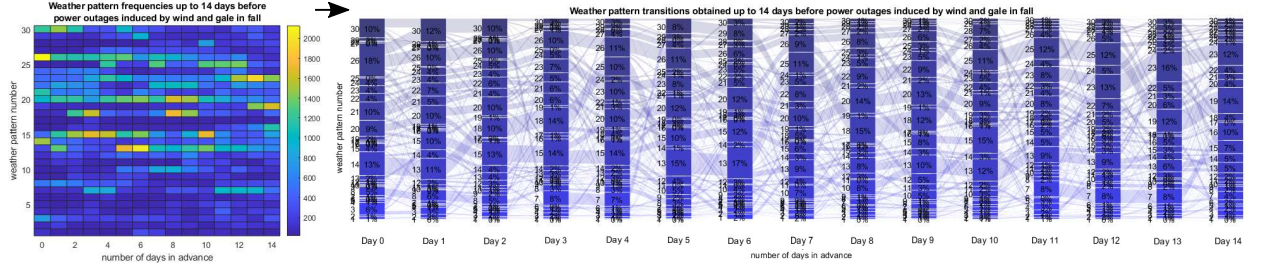

(a) Top 1 fall: wind and gale

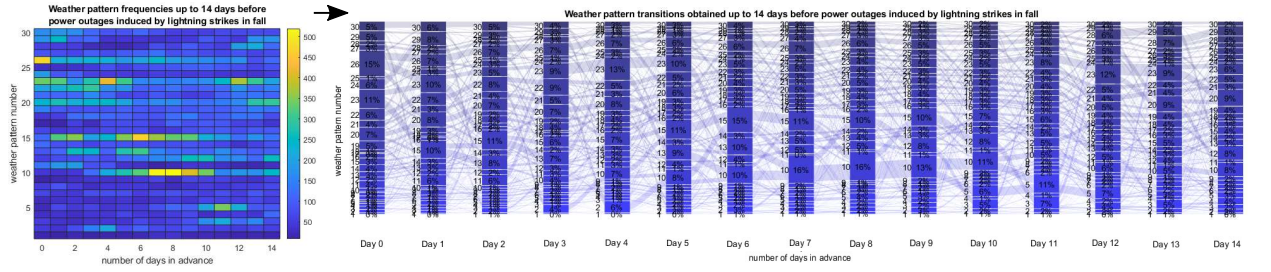

(b) Top 2 fall: lightning strikes

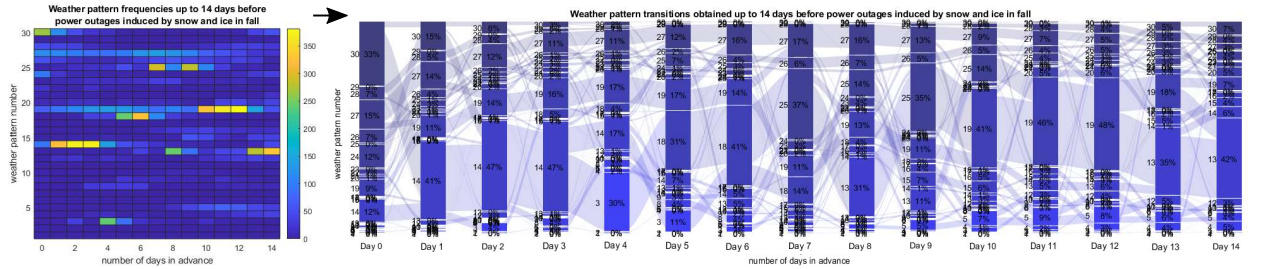

(c) Top 3 fall: snow and ice

Figure A.14: Frequency of occurrence of weather patterns (on the left) and weather pattern transitions (on the right) up to 2 weeks ahead of the three most common causes of weather-induced power outages in fall in the UK from 2010 to 2019.



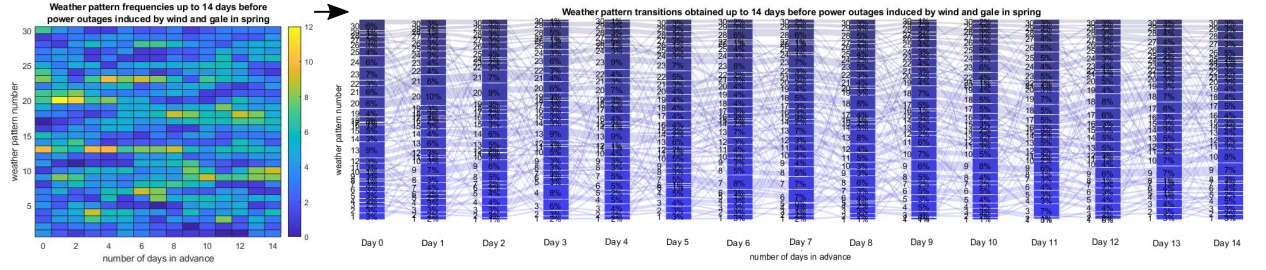

(a) Top 1 spring: wind and gale

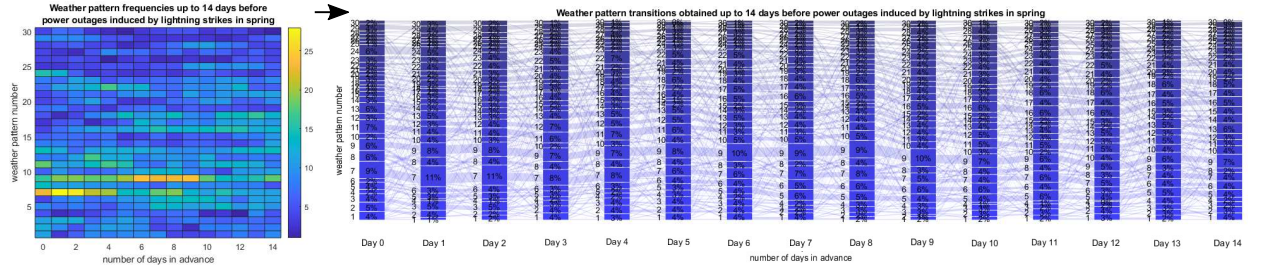

(b) Top 2 spring: lightning strikes

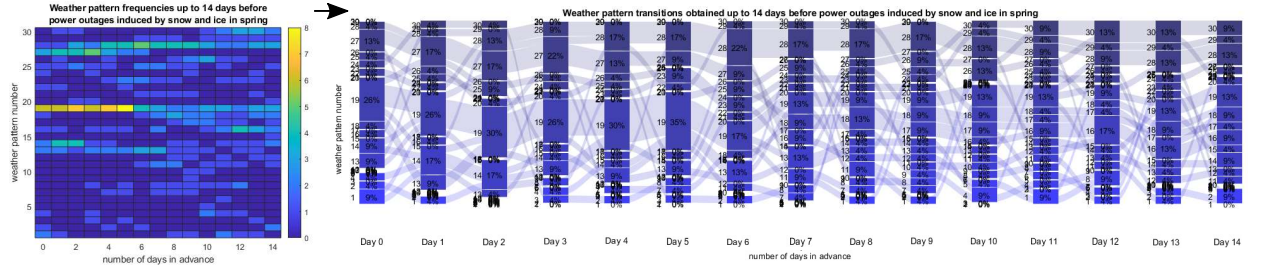

(c) Top 3 spring: snow and ice

Figure A.15: Frequency of occurrence of weather patterns (on the left) and weather pattern transitions (on the right) up to 2 weeks ahead of the three most common causes of weather-induced power outages in spring obtained with data from Northeast England from 2004 to 2021.

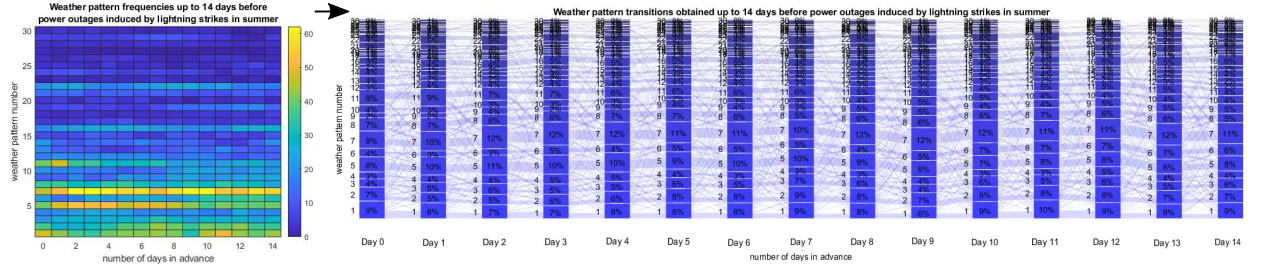

(a) Top 1 summer: lightning strikes

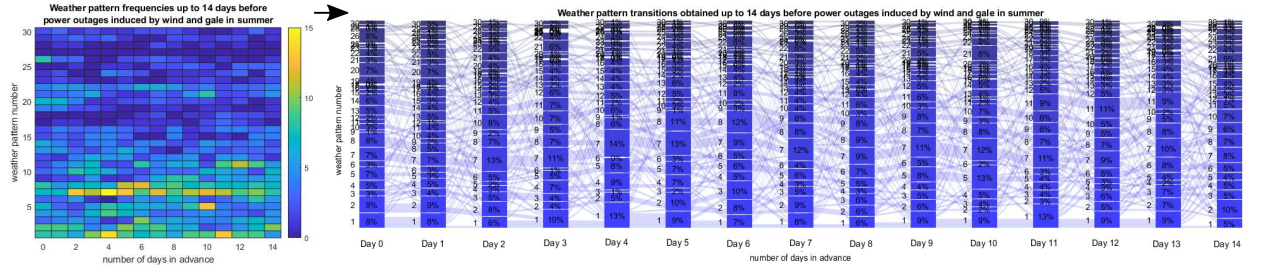

(b) Top 2 summer: wind and gale

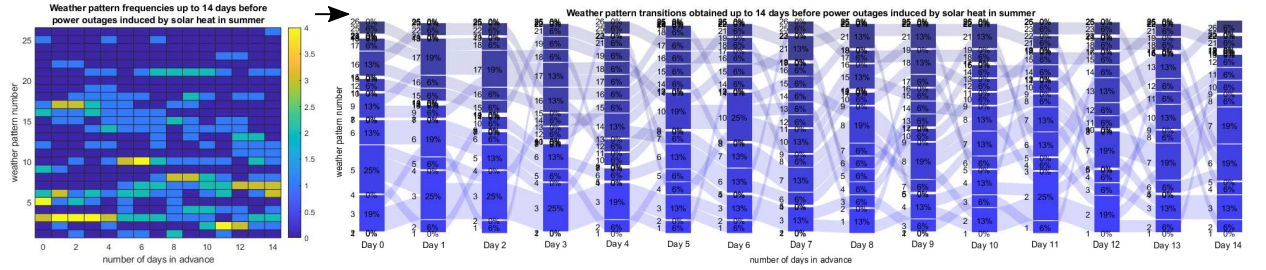

(c) Top 3 summer: solar heat

Figure A.16: Frequency of occurrence of weather patterns (on the left) and weather pattern transitions (on the right) up to 2 weeks ahead of the three most common causes of weather-induced power outages in summer obtained with data from Northeast England from 2004 to 2021.



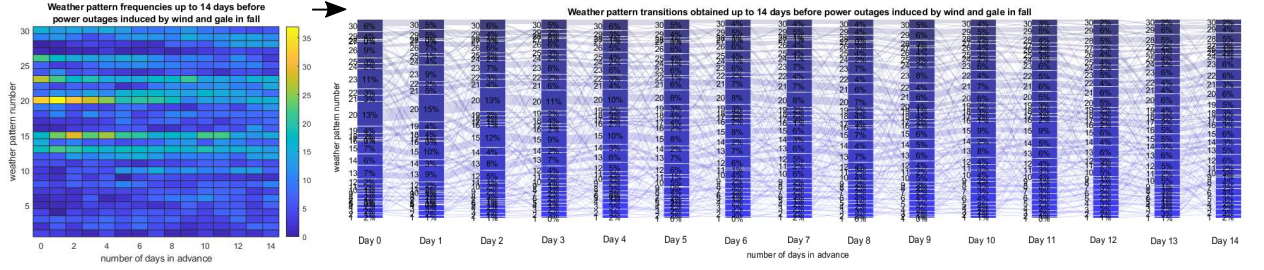

(a) Top 1 fall: wind and gale

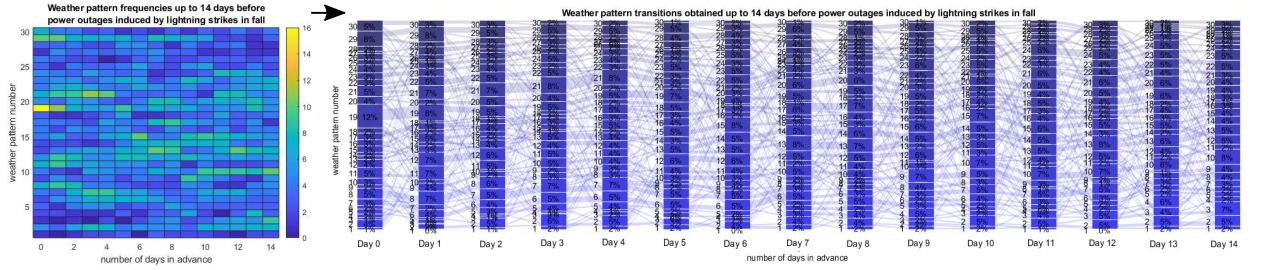

(b) Top 2 fall: lightning strikes

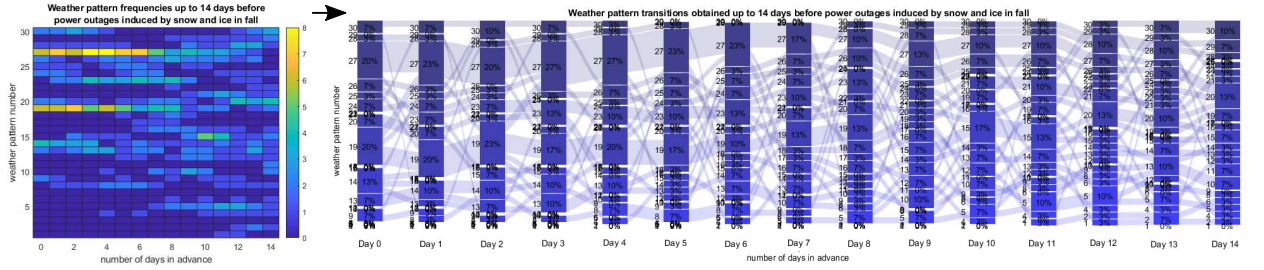

(c) Top 3 fall: snow and ice

Figure A.17: Frequency of occurrence of weather patterns (on the left) and weather pattern transitions (on the right) up to 2 weeks ahead of the three most common causes of weather-induced power outages in fall obtained with data from Northeast England from 2004 to 2021.

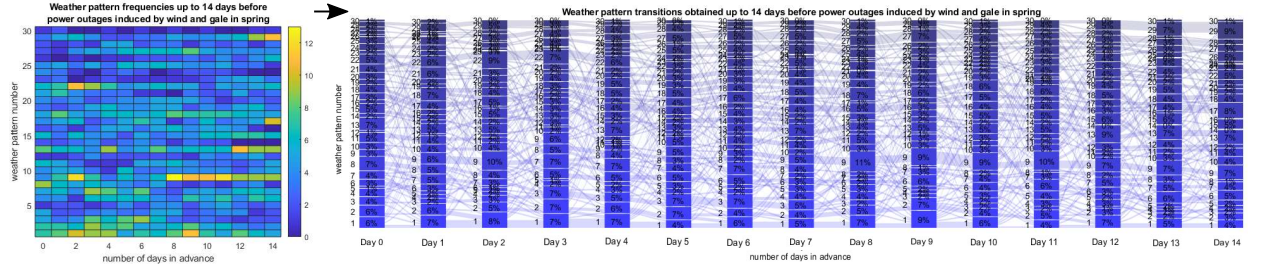

(a) Top 1 spring: wind and gale

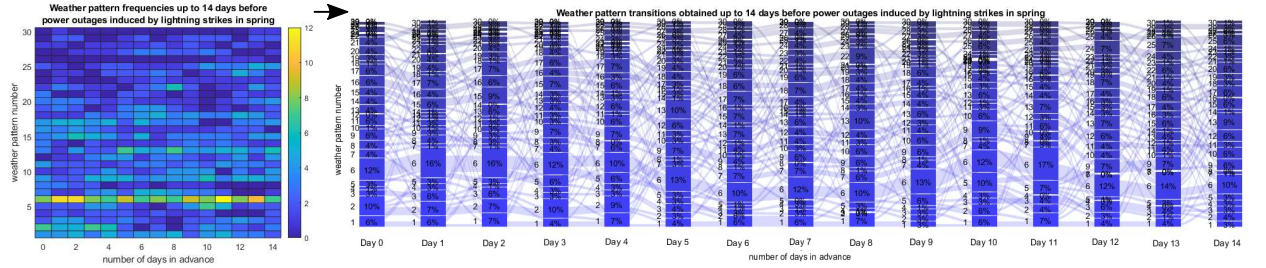

(b) Top 2 spring: lightning strikes

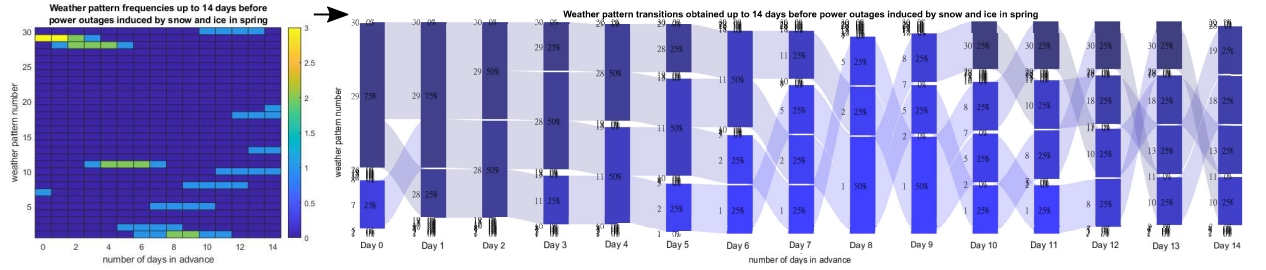

(c) Top 3 spring: snow and ice

Figure A.18: Frequency of occurrence of weather patterns (on the left) and weather pattern transitions (on the right) up to 2 weeks ahead of the three most common causes of weather-induced power outages in spring obtained with data from Southern Scotland from 2017 to 2022.



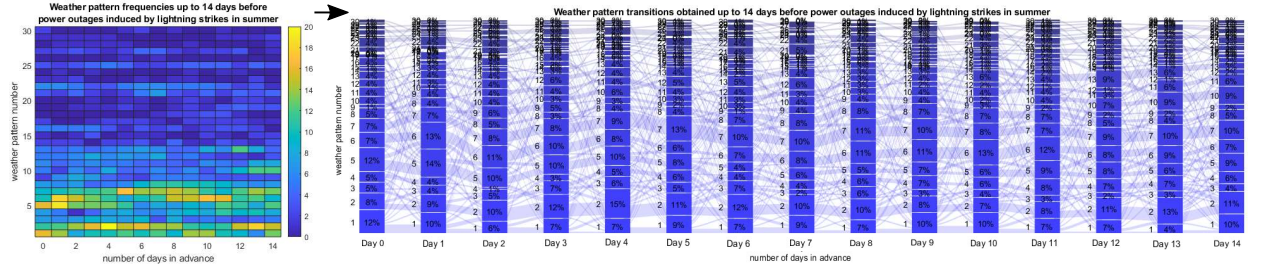

(a) Top 1 summer: lightning strikes

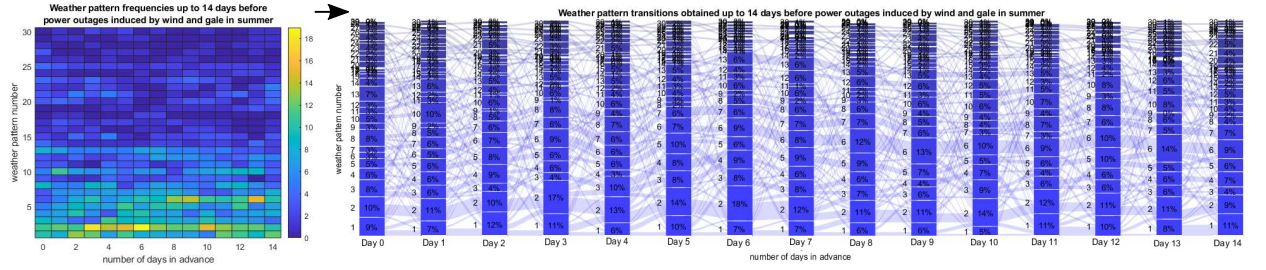

(b) Top 2 summer: wind and gale

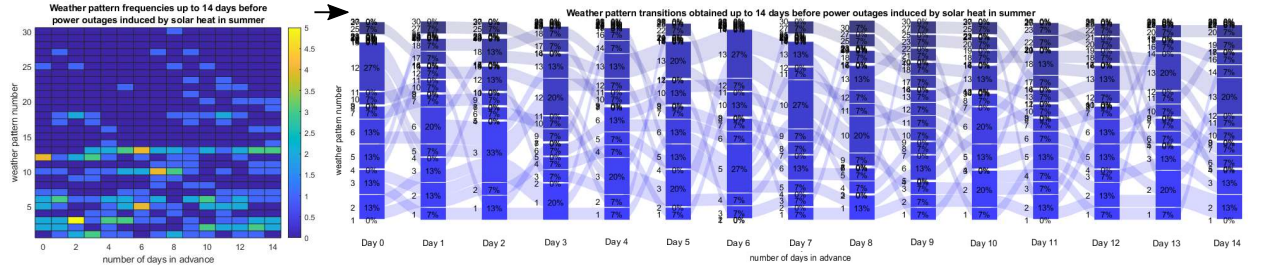

(c) Top 3 summer: solar heat

Figure A.19: Frequency of occurrence of weather patterns (on the left) and weather pattern transitions (on the right) up to 2 weeks ahead of the three most common causes of weather-induced power outages in summer obtained with data from Southern Scotland from 2017 to 2022.

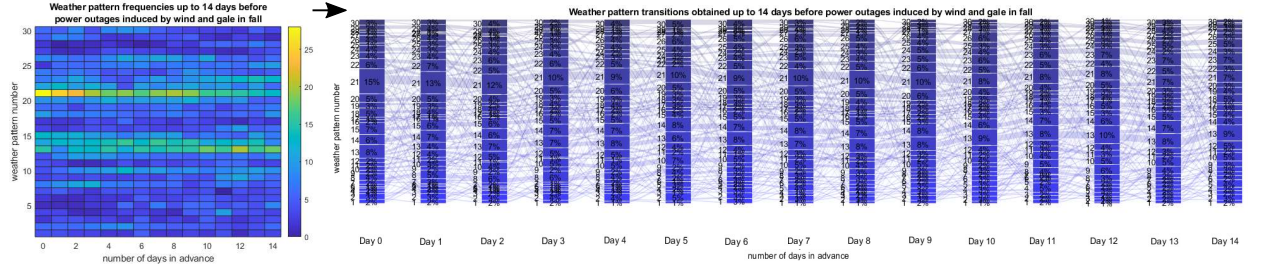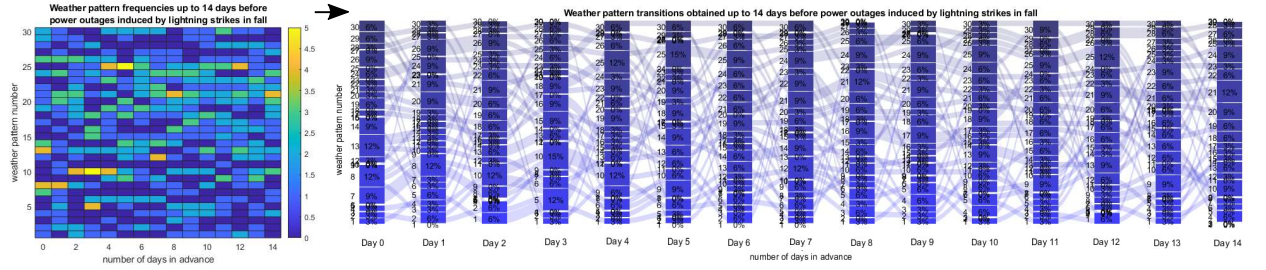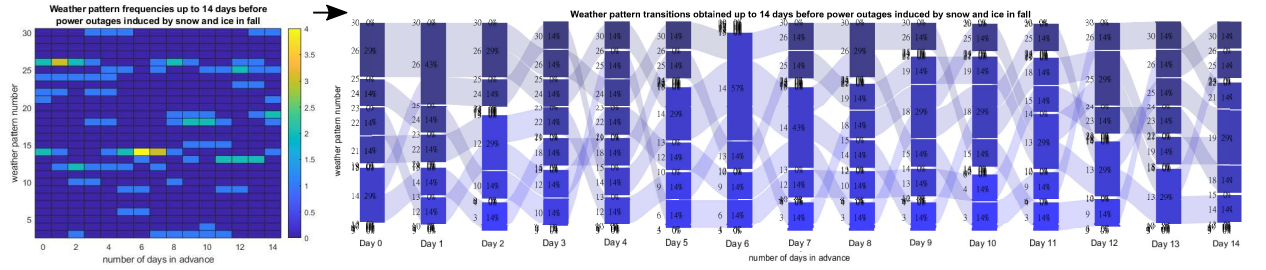

Figure A.20: Frequency of occurrence of weather patterns (on the left) and weather pattern transitions (on the right) up to 2 weeks ahead of the three most common causes of weather-induced power outages in fall obtained with data from Southern Scotland from 2017 to 2022.
